# Supplementary material for: Cytokine storms and pyroptosis are primarily responsible for the rapid death of mice infected with pseudorabies virus
Source: PubMed Central journal article supplement (PMC8385338; doi:10.1098/rsos.210296), 2021-08-25
Supplement: rsos210296_review_history.pdf [file rsos210296_review_history.pdf]

## **Cytokine storms and pyroptosis are primarily responsible for the rapid death of mice infected with pseudorabies virus**

Wei Sun, Shanshan Liu, Xuefei Huang, Rui Yuan and Jiansheng Yu

### **Article citation details**

*R. Soc. open sci.* **8**: 210296.

<http://dx.doi.org/10.1098/rsos.210296>

### **Review timeline**

Original submission: 24 February 2021

1<sup>st</sup> revised submission: 19 July 2021

2<sup>nd</sup> revised submission: 6 August 2021

Final acceptance: 6 August 2021

Note: Reports are unedited and appear as submitted by the referee. The review history appears in chronological order.

## Review History

### RSOS-210296.R0 (Original submission)

#### Review form: Reviewer 1

**Is the manuscript scientifically sound in its present form?**

No

**Are the interpretations and conclusions justified by the results?**

Yes

**Is the language acceptable?**

No

**Do you have any ethical concerns with this paper?**

No

**Have you any concerns about statistical analyses in this paper?**

Yes

**Recommendation?**

Major revision is needed (please make suggestions in comments)

**Comments to the Author(s)**

This paper has some merit addressing an important issue about the role of the immune response in the pathogenesis of the ADV infection in the mouse model. However, it needs a profound revision on the language, more detail in the figures texts, and a complete description of the experimental design (groups and number of animals). Also I would recommend to discuss the evident limitations of the mouse model when extrapolating to economical species suffering of Pseudorabies. The statistical results also should be more explicit in the text and figures to strengthen the discussion. See Appendix A.

**Decision letter (RSOS-210296.R0)**

We hope you are keeping well at this difficult and unusual time. We continue to value your support of the journal in these challenging circumstances. If Royal Society Open Science can assist you at all, please don't hesitate to let us know at the email address below.

Dear Dr Sun

The Editors assigned to your paper RSOS-210296 "Cytokine storms and pyroptosis are primarily responsible for the rapid death of mice infected with pseudorabies virus" have now received comments from reviewers and would like you to revise the paper in accordance with the reviewer comments and any comments from the Editors. Please note this decision does not guarantee eventual acceptance.

We invite you to respond to the comments supplied below and revise your manuscript. Below the referees' and Editors' comments (where applicable) we provide additional requirements. Final acceptance of your manuscript is dependent on these requirements being met. We provide guidance below to help you prepare your revision. There are particular concerns regarding the quality of the written English - please seek advice from a service such as <https://royalsociety.org/journals/authors/benefits/language-editing/> before resubmitting.

We do not generally allow multiple rounds of revision so we urge you to make every effort to fully address all of the comments at this stage. If deemed necessary by the Editors, your manuscript will be sent back to one or more of the original reviewers for assessment. If the original reviewers are not available, we may invite new reviewers.

Please submit your revised manuscript and required files (see below) no later than 21 days from today's (ie 10-Jul-2021) date. Note: the ScholarOne system will 'lock' if submission of the revision is attempted 21 or more days after the deadline. If you do not think you will be able to meet this deadline please contact the editorial office immediately.

Please note article processing charges apply to papers accepted for publication in Royal Society Open Science (<https://royalsocietypublishing.org/rsos/charges>). Charges will also apply to papers transferred to the journal from other Royal Society Publishing journals, as well as papers submitted as part of our collaboration with the Royal Society of Chemistry (<https://royalsocietypublishing.org/rsos/chemistry>). Fee waivers are available but must be requested when you submit your revision (<https://royalsocietypublishing.org/rsos/waivers>).

Thank you for submitting your manuscript to Royal Society Open Science and we look forward to receiving your revision. If you have any questions at all, please do not hesitate to get in touch.

Kind regards,  
Royal Society Open Science Editorial Office  
Royal Society Open Science  
openscience@royalsociety.org

on behalf of Prof Malcolm White (Subject Editor)  
openscience@royalsociety.org

Reviewer comments to Author:

Reviewer: 1

Comments to the Author(s)

This paper has some merit addressing an important issue about the role of the immune response in the pathogenesis of the ADV infection in the mouse model. However, it needs a profound revision on the language, more detail in the figure legends, and a complete description of the experimental design (groups and number of animals). Also I would recommend to discuss the evident limitations of the mouse model when extrapolating to economical species suffering of Pseudorabies. The statistical results also should be more explicit in the text and figures to strengthen the discussion.

Going through the experimental design, it is not clear how the groups of animals were conformed. A total of eighty mice were divided into two groups (probably 40 control and 40 experimental), however, 6 animals of each group were killed at 4 different time points, given a total of 24 mice per group, ¿what happened with the rest of the animals?

On figure 2 six time points were described (36 mice), however, no results on the control group were shown.

All figures need a self-explanatory text. Figure 2 misses IL-18 text.

Although a statistical analysis is claimed to be applied on the results, differences were not shown in the text or on the figures. Since the groups of animals were not accurately described, the analysis must be detailed.

===PREPARING YOUR MANUSCRIPT===

Your revised paper should include the changes requested by the referees and Editors of your manuscript. You should provide two versions of this manuscript and both versions must be provided in an editable format:

one version identifying all the changes that have been made (for instance, in coloured highlight, in bold text, or tracked changes);

a 'clean' version of the new manuscript that incorporates the changes made, but does not highlight them. This version will be used for typesetting if your manuscript is accepted.

Please ensure that any equations included in the paper are editable text and not embedded images.

Please ensure that you include an acknowledgements' section before your reference list/bibliography. This should acknowledge anyone who assisted with your work, but does not qualify as an author per the guidelines at <https://royalsociety.org/journals/ethics-policies/openness/>.

While not essential, it will speed up the preparation of your manuscript proof if accepted if you format your references/bibliography in Vancouver style (please see

<https://royalsociety.org/journals/authors/author-guidelines/#formatting>). You should include DOIs for as many of the references as possible.

If you have been asked to revise the written English in your submission as a condition of publication, you must do so, and you are expected to provide evidence that you have received language editing support. The journal would prefer that you use a professional language editing service and provide a certificate of editing, but a signed letter from a colleague who is a native speaker of English is acceptable. Note the journal has arranged a number of discounts for authors using professional language editing services (<https://royalsociety.org/journals/authors/benefits/language-editing/>).

===PREPARING YOUR REVISION IN SCHOLARONE===

To revise your manuscript, log into <https://mc.manuscriptcentral.com/rsos> and enter your Author Centre - this may be accessed by clicking on "Author" in the dark toolbar at the top of the page (just below the journal name). You will find your manuscript listed under "Manuscripts with Decisions". Under "Actions", click on "Create a Revision".

Attach your point-by-point response to referees and Editors at Step 1 'View and respond to decision letter'. This document should be uploaded in an editable file type (.doc or .docx are preferred). This is essential.

Please ensure that you include a summary of your paper at Step 2 'Type, Title, & Abstract'. This should be no more than 100 words to explain to a non-scientific audience the key findings of your research. This will be included in a weekly highlights email circulated by the Royal Society press office to national UK, international, and scientific news outlets to promote your work.

At Step 3 'File upload' you should include the following files:

-- Your revised manuscript in editable file format (.doc, .docx, or .tex preferred). You should upload two versions:

- 1) One version identifying all the changes that have been made (for instance, in coloured highlight, in bold text, or tracked changes);
- 2) A 'clean' version of the new manuscript that incorporates the changes made, but does not highlight them.

-- An individual file of each figure (EPS or print-quality PDF preferred [either format should be produced directly from original creation package], or original software format).

-- An editable file of each table (.doc, .docx, .xls, .xlsx, or .csv).

-- An editable file of all figure and table captions.

Note: you may upload the figure, table, and caption files in a single Zip folder.

-- Any electronic supplementary material (ESM).

-- If you are requesting a discretionary waiver for the article processing charge, the waiver form must be included at this step.

-- If you are providing image files for potential cover images, please upload these at this step, and inform the editorial office you have done so. You must hold the copyright to any image provided.

-- A copy of your point-by-point response to referees and Editors. This will expedite the preparation of your proof.

At Step 6 'Details & comments', you should review and respond to the queries on the electronic submission form. In particular, we would ask that you do the following:

-- Ensure that your data access statement meets the requirements at

<https://royalsociety.org/journals/authors/author-guidelines/#data>. You should ensure that you cite the dataset in your reference list. If you have deposited data etc in the Dryad repository, please include both the 'For publication' link and 'For review' link at this stage.

-- If you are requesting an article processing charge waiver, you must select the relevant waiver option (if requesting a discretionary waiver, the form should have been uploaded at Step 3 'File upload' above).

-- If you have uploaded ESM files, please ensure you follow the guidance at <https://royalsociety.org/journals/authors/author-guidelines/#supplementary-material> to include a suitable title and informative caption. An example of appropriate titling and captioning may be found at [https://figshare.com/articles/Table\\_S2\\_from\\_Is\\_there\\_a\\_trade-off\\_between\\_peak\\_performance\\_and\\_performance\\_breadth\\_across\\_temperatures\\_for\\_aerobic\\_scope\\_in\\_teleost\\_fishes\\_/3843624](https://figshare.com/articles/Table_S2_from_Is_there_a_trade-off_between_peak_performance_and_performance_breadth_across_temperatures_for_aerobic_scope_in_teleost_fishes_/3843624).

At Step 7 'Review & submit', you must view the PDF proof of the manuscript before you will be able to submit the revision. Note: if any parts of the electronic submission form have not been completed, these will be noted by red message boxes.

## Author's Response to Decision Letter for (RSOS-210296.R0)

See Appendix B.

## RSOS-210296.R1 (Revision)

### Review form: Reviewer 1

**Is the manuscript scientifically sound in its present form?**

Yes

**Are the interpretations and conclusions justified by the results?**

Yes

**Is the language acceptable?**

No

**Do you have any ethical concerns with this paper?**

No

**Have you any concerns about statistical analyses in this paper?**

No

**Recommendation?**

Accept with minor revision (please list in comments)

**Comments to the Author(s)**

This paper is now suitable for publication. However, requires a further review of the language to make it more understandable. Please check up the comments made on the yellow marked words or phrases, as well as on the stoke out words in the reviewed PDF file and be sure to amend the errors.

## Decision letter (RSOS-210296.R1)

We hope you are keeping well at this difficult and unusual time. We continue to value your support of the journal in these challenging circumstances. If Royal Society Open Science can assist you at all, please don't hesitate to let us know at the email address below.

Dear Mr Sun

On behalf of the Editors, we are pleased to inform you that your Manuscript RSOS-210296.R1 "Cytokine storms and pyroptosis are primarily responsible for the rapid death of mice infected with pseudorabies virus" has been accepted for publication in Royal Society Open Science subject to minor revision in accordance with the referees' reports. Please find the referees' comments along with any feedback from the Editors below my signature.

We invite you to respond to the comments and revise your manuscript. Below the referees' and Editors' comments (where applicable) we provide additional requirements. Final acceptance of your manuscript is dependent on these requirements being met. We provide guidance below to help you prepare your revision.

Please submit your revised manuscript and required files (see below) no later than 7 days from today's (ie 02-Aug-2021) date. Note: the ScholarOne system will 'lock' if submission of the revision is attempted 7 or more days after the deadline. If you do not think you will be able to meet this deadline please contact the editorial office immediately.

Please note article processing charges apply to papers accepted for publication in Royal Society Open Science (<https://royalsocietypublishing.org/rsos/charges>). Charges will also apply to papers transferred to the journal from other Royal Society Publishing journals, as well as papers submitted as part of our collaboration with the Royal Society of Chemistry (<https://royalsocietypublishing.org/rsos/chemistry>). Fee waivers are available but must be requested when you submit your revision (<https://royalsocietypublishing.org/rsos/waivers>).

Thank you for submitting your manuscript to Royal Society Open Science and we look forward to receiving your revision. If you have any questions at all, please do not hesitate to get in touch.

Kind regards,  
Royal Society Open Science Editorial Office  
Royal Society Open Science  
[openscience@royalsociety.org](mailto:openscience@royalsociety.org)

on behalf of Professor Malcolm White (Subject Editor)  
[openscience@royalsociety.org](mailto:openscience@royalsociety.org)

Associate Editor Comments to Author:

Please ensure that you carefully revise the paper to take into account the remaining queries/comments of the reviewer. As you have been requested to edit the written English, you must provide proof that you have done so: acceptable proof includes a certificate of language-editing from a language editing service or a signed letter from a native speaker of English. If you do not provide this proof, your manuscript may be returned to you.

For information about language editing services endorsed by the Royal Society, please follow the link below:  
<https://royalsociety.org/journals/authors/language-polishing/>

Reviewer comments to Author:  
Reviewer: 1  
Comments to the Author(s)

This paper is now suitable for publication. However, requires a further review of the language to make it more understandable. Please check up the comments made on the yellow marked words or phrases, as well as on the stoke out words in the reviewed PDF file and be sure to amend the errors.

===PREPARING YOUR MANUSCRIPT===

Your revised paper should include the changes requested by the referees and Editors of your manuscript. You should provide two versions of this manuscript and both versions must be provided in an editable format:

one version identifying all the changes that have been made (for instance, in coloured highlight, in bold text, or tracked changes);

a 'clean' version of the new manuscript that incorporates the changes made, but does not highlight them. This version will be used for typesetting.

Please ensure that any equations included in the paper are editable text and not embedded images.

Please ensure that you include an acknowledgements' section before your reference list/bibliography. This should acknowledge anyone who assisted with your work, but does not qualify as an author per the guidelines at <https://royalsociety.org/journals/ethics-policies/openness/>.

While not essential, it will speed up the preparation of your manuscript proof if you format your references/bibliography in Vancouver style (please see <https://royalsociety.org/journals/authors/author-guidelines/#formatting>). You should include DOIs for as many of the references as possible.

If you have been asked to revise the written English in your submission as a condition of publication, you must do so, and you are expected to provide evidence that you have received language editing support. The journal would prefer that you use a professional language editing service and provide a certificate of editing, but a signed letter from a colleague who is a native speaker of English is acceptable. Note the journal has arranged a number of discounts for authors using professional language editing services (<https://royalsociety.org/journals/authors/benefits/language-editing/>).

===PREPARING YOUR REVISION IN SCHOLARONE===

To revise your manuscript, log into <https://mc.manuscriptcentral.com/rsos> and enter your Author Centre - this may be accessed by clicking on "Author" in the dark toolbar at the top of the page (just below the journal name). You will find your manuscript listed under "Manuscripts with Decisions". Under "Actions", click on "Create a Revision".

Attach your point-by-point response to referees and Editors at Step 1 'View and respond to decision letter'. This document should be uploaded in an editable file type (.doc or .docx are preferred). This is essential.

Please ensure that you include a summary of your paper at Step 2 'Type, Title, & Abstract'. This should be no more than 100 words to explain to a non-scientific audience the key findings of your

research. This will be included in a weekly highlights email circulated by the Royal Society press office to national UK, international, and scientific news outlets to promote your work.

At Step 3 'File upload' you should include the following files:

-- Your revised manuscript in editable file format (.doc, .docx, or .tex preferred). You should upload two versions:

- 1) One version identifying all the changes that have been made (for instance, in coloured highlight, in bold text, or tracked changes);
- 2) A 'clean' version of the new manuscript that incorporates the changes made, but does not highlight them.

-- An individual file of each figure (EPS or print-quality PDF preferred [either format should be produced directly from original creation package], or original software format).

-- An editable file of each table (.doc, .docx, .xls, .xlsx, or .csv).

-- An editable file of all figure and table captions.

Note: you may upload the figure, table, and caption files in a single Zip folder.

-- Any electronic supplementary material (ESM).

-- If you are requesting a discretionary waiver for the article processing charge, the waiver form must be included at this step.

-- If you are providing image files for potential cover images, please upload these at this step, and inform the editorial office you have done so. You must hold the copyright to any image provided.

-- A copy of your point-by-point response to referees and Editors. This will expedite the preparation of your proof.

At Step 6 'Details & comments', you should review and respond to the queries on the electronic submission form. In particular, we would ask that you do the following:

-- Ensure that your data access statement meets the requirements at

<https://royalsociety.org/journals/authors/author-guidelines/#data>. You should ensure that you cite the dataset in your reference list. If you have deposited data etc in the Dryad repository, please only include the 'For publication' link at this stage. You should remove the 'For review' link.

-- If you are requesting an article processing charge waiver, you must select the relevant waiver option (if requesting a discretionary waiver, the form should have been uploaded at Step 3 'File upload' above).

-- If you have uploaded ESM files, please ensure you follow the guidance at

<https://royalsociety.org/journals/authors/author-guidelines/#supplementary-material> to include a suitable title and informative caption. An example of appropriate titling and captioning may be found at [https://figshare.com/articles/Table\\_S2\\_from\\_Is\\_there\\_a\\_trade-off\\_between\\_peak\\_performance\\_and\\_performance\\_breadth\\_across\\_temperatures\\_for\\_aerobic\\_scope\\_in\\_teleost\\_fishes\\_/3843624](https://figshare.com/articles/Table_S2_from_Is_there_a_trade-off_between_peak_performance_and_performance_breadth_across_temperatures_for_aerobic_scope_in_teleost_fishes_/3843624).

At Step 7 'Review & submit', you must view the PDF proof of the manuscript before you will be able to submit the revision. Note: if any parts of the electronic submission form have not been completed, these will be noted by red message boxes.

## Author's Response to Decision Letter for (RSOS-210296.R1)

See Appendix C.



## Decision letter (RSOS-210296.R2)

We hope you are keeping well at this difficult and unusual time. We continue to value your support of the journal in these challenging circumstances. If Royal Society Open Science can assist you at all, please don't hesitate to let us know at the email address below.

Dear Mr Sun,

I am pleased to inform you that your manuscript entitled "Cytokine storms and pyroptosis are primarily responsible for the rapid death of mice infected with pseudorabies virus" is now accepted for publication in Royal Society Open Science.

Please ensure that you send to the editorial office an editable version of your accepted manuscript, and individual files for each figure and table included in your manuscript. You can send these in a zip folder if more convenient. Failure to provide these files may delay the processing of your proof. You may disregard this request if you have already provided these files to the editorial office.

If you have not already done so, please remember to make any data sets or code libraries 'live' prior to publication, and update any links as needed when you receive a proof to check - for instance, from a private 'for review' URL to a publicly accessible 'for publication' URL. It is good practice to also add data sets, code and other digital materials to your reference list.

You can expect to receive a proof of your article in the near future. Please contact the editorial office ([openscience@royalsociety.org](mailto:openscience@royalsociety.org)) and the production office ([openscience\\_proofs@royalsociety.org](mailto:openscience_proofs@royalsociety.org)) to let us know if you are likely to be away from e-mail contact -- if you are going to be away, please nominate a co-author (if available) to manage the proofing process, and ensure they are copied into your email to the journal. Due to rapid publication and an extremely tight schedule, if comments are not received, your paper may experience a delay in publication.

Please see the Royal Society Publishing guidance on how you may share your accepted author manuscript at <https://royalsociety.org/journals/ethics-policies/media-embargo/>. After publication, some additional ways to effectively promote your article can also be found here <https://royalsociety.org/blog/2020/07/promoting-your-latest-paper-and-tracking-your-results/>.

On behalf of the Editors of Royal Society Open Science, thank you for your support of the journal and we look forward to your continued contributions to Royal Society Open Science.

Kind regards,  
Royal Society Open Science Editorial Office  
Royal Society Open Science  
[openscience@royalsociety.org](mailto:openscience@royalsociety.org)

on behalf of Malcolm White (Subject Editor)  
[openscience@royalsociety.org](mailto:openscience@royalsociety.org)

Follow Royal Society Publishing on Twitter: @RSocPublishing  
Follow Royal Society Publishing on Facebook:  
<https://www.facebook.com/RoyalSocietyPublishing.FanPage/>  
Read Royal Society Publishing's blog:  
<https://royalsociety.org/blog/blogsearchpage/?category=Publishing>

**Appendix A****ROYAL SOCIETY  
OPEN SCIENCE****Cytokine **stroms** and pyroptosis are primarily responsible  
for the rapid death of mice infected with pseudorabies virus**

|                               |                                                                                                                                                                                                                                                                                                                                                                                                                                                           |
|-------------------------------|-----------------------------------------------------------------------------------------------------------------------------------------------------------------------------------------------------------------------------------------------------------------------------------------------------------------------------------------------------------------------------------------------------------------------------------------------------------|
| Journal:                      | <i>Royal Society Open Science</i>                                                                                                                                                                                                                                                                                                                                                                                                                         |
| Manuscript ID                 | RSOS-210296                                                                                                                                                                                                                                                                                                                                                                                                                                               |
| Article Type:                 | Research                                                                                                                                                                                                                                                                                                                                                                                                                                                  |
| Date Submitted by the Author: | 24-Feb-2021                                                                                                                                                                                                                                                                                                                                                                                                                                               |
| Complete List of Authors:     | Liu, Shanshan; Tongren Polytechnic College; National and Local Engineering Research Centre for Separation and Purification Ethnic Chinese Veterinary Herbs<br>Sun, Wei; Tongren Polytechnic College<br>Huang, Xuefei; Tongren Polytechnic College<br>Yuan, Rui; Tongren Polytechnic College<br>Yu, Jiansheng; Tongren Polytechnic College; National and Local Engineering Research Centre for Separation and Purification Ethnic Chinese Veterinary Herbs |
| Subject:                      | biotechnology < BIOLOGY, health and disease and epidemiology < BIOLOGY                                                                                                                                                                                                                                                                                                                                                                                    |
| Keywords:                     | cytokine stroms, pyroptosis, pseudorabies virus                                                                                                                                                                                                                                                                                                                                                                                                           |
| Subject Category:             | Biochemistry, Cellular and Molecular Biology                                                                                                                                                                                                                                                                                                                                                                                                              |
|                               |                                                                                                                                                                                                                                                                                                                                                                                                                                                           |

SCHOLARONE™  
Manuscripts

**Author-supplied statements**

Relevant information will appear here if provided.

**Ethics**

*Does your article include research that required ethical approval or permits?:*

Yes

*Statement (if applicable):*

The authors declare that this manuscript is original, which has not been published before and is also not currently being considered for publication elsewhere.

All animal procedures were approved by the Tongren Polytechnic College Animal Care and Use Committee and were in accordance with the NIH Guide for the Care and Use of Laboratory Animals.

**Data**

*It is a condition of publication that data, code and materials supporting your paper are made publicly available. Does your paper present new data?:*

Yes

*Statement (if applicable):*

The datasets supporting this article have been uploaded in the form of *Supplementary Material*. In addition, the material related to this **wirk** are deposited at Dryad ([https://datadryad.org/stash/share/2URdlvjkcYyMv4hp7II9NWoj-\\_gwX3Vsx4uZ-h\\_Gmk](https://datadryad.org/stash/share/2URdlvjkcYyMv4hp7II9NWoj-_gwX3Vsx4uZ-h_Gmk))

**Conflict of interest**

I/We declare we have no competing interests

*Statement (if applicable):*

CUST\_STATE\_CONFLICT :No data available.

**Authors' contributions**

This paper has multiple authors and our individual contributions were as below

*Statement (if applicable):*

Shanshan Liu did the molecular lab work and drafted the manuscript; Wei Sun conceived this study and participated in the data analysis and artwork making; Rui Yuan did the animal experiment.

Xuefei Huang and Jiansheng Yu gave a finally revised the manuscript.

# Cytokine storms and pyroptosis are primarily responsible for the rapid death of mice infected with pseudorabies virus

Shanshan Liu<sup>1,2</sup>, Wei Sun<sup>1\*</sup>, Xuefei Huang<sup>1</sup>, Rui Yuan<sup>1,2</sup> and Jiansheng Yu<sup>1,2</sup>

<sup>1</sup>College of Agriculture, Tongren Polytechnic College, Bijiang District, Tongren City, Guizhou, 554300, China

<sup>2</sup>National and Local Engineering Research Centre for Separation and Purification Ethnic Chinese Veterinary Herbs, Tongren City, Guizhou, 554300, China

**Keywords:** cytokine storms; pyroptosis; pseudorabies virus

## Abstract

Pseudorabies virus (PRV), the causative agent of Aujeszky's disease (AD), is one of the most harmful pathogens to pig industry. PRV has the ability to infect and kill a variety of mammals. Nevertheless, the underlying pathogenesis related to PRV is still unclear. This study aims to investigate the pathogenesis induced by PRV in a mouse model. The mice infected with PRV-HLJ strain developed severe clinical manifestations at 36 hours post infection (hpi), and mortality occurred within 48–72 hpi. Hematoxylin eosin staining and qRT-PCR methods were used to detect the pathological damage and expression of cytokines related to immune in brain tissue, respectively. The cytokine storms caused by IFN- $\alpha$ , IFN- $\beta$ , TNF- $\alpha$ , IL-1 $\beta$ , IL-6 and IL-18 was related to the histopathological changes induced by PRV. This pattern of cytokine secretion clearly depicts an image of a typical cytokine storm, characterized by dysregulated secretion of pro-inflammatory cytokines and imbalanced pro-inflammatory and anti-inflammatory responses. In addition, the pyroptosis pathway was also activated by PRV through elevating the expression levels of nod-like receptor protein 3, caspase-1, gasdeimin-D and interleukin-1 $\beta$ /18. These findings provide a way for further understanding of the molecular basis in PRV pathogenesis.

## 1. Introduction

Pseudorabies virus (PRV) or suid  $\alpha$  herpesvirus 1 is the pathogen of porcine Aujeszky disease (AD), which causes symptoms of respiratory system, nervous system and reproductive system<sup>1</sup>. Besides pigs, many mammals are susceptible to PRV infection, such as cattle, sheep, rabbits, cats, dogs, guinea pigs, rats and mice<sup>2</sup>. However, pigs are the only susceptible animals that can survive, although the prognosis of the disease largely depends on the factors including inoculation site, virus strain and titer as well as age of pigs *et. al.*<sup>3</sup>. AD is a highly infectious disease with high mortality in piglets. Transmission mainly occurs through direct contact with oral and nasal secretions, but can also occur through aerosol through placenta or sexual intercourse<sup>1</sup>. Therefore, the prevalence of PRV has led to a wide range of economic losses in the pork production industry. Inactivated and attenuated vaccines have been developed to delay or reduce swine death, but they are not yet able to eradicate the disease because none of them prevent potential infection and reactivation and shedding of virulence field virus<sup>4</sup>. Due to the serious impact of AD on pig industry, some countries are trying to eradicate AD basing on the DIVA (Differentiating Infected From Vaccinated animals) program. However, since 2011, the outbreak of AD occurred in farm pigs vaccinated with PR vaccine in China, which indicates that AD vaccine can not provide effective treatment to prevent wild PR infection<sup>5</sup>.

Mice and rabbits are usually used to study PRV in the laboratory. After infection, the animals showed abnormal excitement and nasal itching, accompanied by convulsions, and rapid death. In mice, PRV almost completely manifested as a neurogenic infection of the central nervous system (CNS), accompanied by fulminant central nervous symptoms and high mortality<sup>6</sup>. PRV is known to cause severe encephalitis in piglets, various non-native hosts, even in humans<sup>7</sup>. Few studies have focused on the pathogenesis of encephalitis. It is known that pyroptosis involved in the immune response in various types of cell, which can be triggered by a variety of pathological stimuli, leading to the secretion of proinflammatory cytokines and intracellular contents<sup>8</sup>. Inflammation is a double-edged sword, which has a crucial role in metabolism. Mild inflammatory response could protect the body to a certain degree,

\*Author for correspondence (sunwei\_223@163.com).

†Present address: College of Agriculture, Tongren Polytechnic College, Bijiang District, Tongren City, Guizhou, 554300, China

50 help to repair damaged tissue, and be beneficial to steady-state reconstruction. Nevertheless, excessive inflammation  
51 may form a "cytokine storm", leading to tissue damage. In the present work, we describe the influence of PRV on the  
52 immune factor and pyroptosis-related factor in mice brain.

## 2. Materials and Methods

### 2.1 Reagents and animals

55 Annexin V-FITC/PI Apoptosis Kit was obtained from B D Company (Franklin Lakes, USA). Modified Bradford  
56 Protein Assay Kit, Antibody against NLRP3, Animal Total RNA Isolation Kit and Tissue Total Protein Extraction  
57 Kit were supplied by Sagon Biotech Company (Shanghai, China). Another antibody against Gasdermin D (GSDMD)  
58 was bought from Thermo Fisher Company (USA). IL-1 $\beta$ , IL-18 and  $\beta$ -actin antibodies were obtained from Bioss  
59 Company (Beijing, China). Caspase-1 antibody was obtained from Boster Biological Technology com.Ltd (Wuhan,  
60 Hubei, China). PrimeScript RT reagent Kit was bought from TAKARA company (Daliang, China). PRV-HLJ strain  
61 (MK080279.1) isolated Heilong Jiang was provided by Professor Jingfei Wang from Harbin Veterinary Research  
62 Institute, CAAS. Eighty 6-week-old female Balb/C mice were obtained from Dossy Experimental Animal  
63 Corporation (Chengdu, China).

### 2.2 Experimental

65 One week later, the mice were divided randomly into two groups, i.e control and post-infection groups. The mice in  
66 the first group were injected via hypodermic injection with 0.2 mL of physiological normal saline (NS). The mice in  
67 the second group was received with 0.2 mL PRV-HLJ strain( $10^4$  TCID<sub>50</sub>). The animals were fed in the room  
68 illuminated with a 12 h light-dark cycle. The ambient temperature and relative humidity maintained at 22-24°C and  
69 40-60%, respectively. Ten mice were fed in each cage and given the above dosage. Water and diet was provided ad  
70 libitum. Six mice from each group were killed at 36, 48, 60 and 72 hour post infection (hpi), and their brain tissues  
71 were collected aseptically. Subsection specimens were snap frozen and stored at -80°C for RNA extraction. In  
72 addition, portions of the brain were fixed in 4% paraformaldehyde solution for histopathological examination.

### 2.3 Histopathological analysis

74 Histopathological observation was operated by using a standard laboratory procedure. The brain was removed from  
75 experimental animals and washed thoroughly in phosphate buffered saline (PBS, pH 7.4). Then, the tissue was fixed  
76 in 4% paraformaldehyde for 2 d and transferred to 95% percent or absolute alcohol for dehydration. Thereafter,  
77 processed to paraffin embedding routine. The paraffin-embedded tissue was sliced into a 5  $\mu$ m section, dewaxed in  
78 xylene and then rehydrated in graded alcohols. Section was stained with hematoxylin and eosin (H.E) staining and  
79 then examined under light microscope for histopathological examination.

### 2.4 Detection of pyroptosis by flow cytometry in brain

81 The rate of pyroptosis cells in brain was measured using an annexin V-FITC/PI Apoptosis kit according to the  
82 manuscript's protocol. Brains were taken from mice, which were humanely killed at time above mentioned, ground to  
83 form suspension and filtered with a 300-mesh nylon screen. The cells were washed three times with pre-cold PBS  
84 and adjusted at a concentration of  $1 \times 10^6$  cells/mL. Furthermore, 100  $\mu$ L cells were incubated with annexin V-  
85 FITC/PI staining at room temperature for 15 min in a culture tube in the dark atmosphere. Each tube was added with  
86 300  $\mu$ L of binding buffer and then detected with a FCM (Becton Dickinson, USA). CellQuest Pro software (Becton  
87 Dickinson, USA) was used to visualize the results.

### 2.5 RNA extraction and qRT-PCR analysis

90 Total RNA from brains were isolated by a "Animal Total RNA Isolation Kit" according to the kit directions. RNA  
91 integrity was detected by 2% agarose gel electrophoresis. A spectrophotometer was used to detect the RNA quantity  
92 and quality (NanoDrop-2000, ThermoFisher Company, USA). Total RNA was converted into DNA for qRT-PCR by  
93 using the PrimeScript RT reagent Kit. The first strand of cDNA was amplified through SYBR staining on a  
94 LightCycler 96 apparatus (Roche, Germany). All primers used in this research were designed by Oligo 7 software  
95 and synthesized by Sagon Biotech Ltd., (Shanghai, China). Detailed information about primers were available in  
96 Table S1. 2<sup>- $\Delta\Delta$ Ct</sup> method was used for the analysis of mRNA expression.  $\beta$ -actin, a housekeeping gene, was used as  
97 an internal control for values correction.

### 2.6 Western blotting

100 A "Tissue Total Protein Extraction Kit" was used for protein extracted from brain. Protein concentration of each  
101 specimen was measured by Bradford assay. The proteins were first separated on a 10% sodium dodecyl sulfate  
102 polyacrylamide gel electrophoresis (SDS-PAGE) followed by being transferred onto a polyvinylidene difluoride  
103 (PVDF) membrane. Then, the PVDF membrane was blocked with TBST solution contained with 5% non-fat milk at

room condition for 2 h, and then incubated at 4°C condition for 12 h with the corresponding primary antibodies diluted with a solution: NLRP3(1:1000), Caspase-1(1:800), GSDMD(1:900), IL-1β(1:500), IL-1β(1:500) and β-actin(1:2000). Then, the PVDF membrane was incubated at room temperature with HRP-labeled secondary antibody for 1 h and blots were measured by a ECL reagent. The β-actin was used as a protein loading control.

## 2.7 Statistical analysis

SPSS22.0 software was used to data analyses. The results were espresented as means ± standards deviations(mean±SD). One-way analysis of variance (ANOVA) package in SPSS 22.0 was used to evaluate the statistical significances between PRV and control group. GraphPad Prism6.0 software was used to perform statistical artworks. In all statistical comparisons, *p* value was introduced as a judgment to the statistical difference.

## 3. Results

### 3.1 Clinical symptoms and histopathological analysis

At 36 hpi, the mice infected with PRV generally showed typical clinical signs, including depression, anorexia and neuropathic itch. Mortality occurred within the period of 48-72 hpi. However, none of the mice in control group exhibited clinical symptoms or died.

Compared with the control group, there was a significant difference in the microscopic lesions in the PRV-inoculated mice (Figure 1). Normal brain structure was found in the control and PRV-inoculated mice before 36 hpi (Figure 1A and B). At 48 hpi, hyperemia appeared in brain tissue follow by perivascular space widened, perivascular lymphocytes increased, as well as degeneration and necrosis occurred in some neurons (Figure 1C). Focal lymphocytic infiltration was found in the brain at 60-72 hpi (Figure D and E).

### 3.2 The mRNA expression levels about innate immune-related genes

Innate immunity recognizes invading pathogens by binding to pattern recognition receptors, leading to the expression of antiviral molecules. Interferons (IFN) is an antiviral molecule, which has a pivotal role in the clearance of invading pathogenic microorganisms<sup>9</sup>. In this work, the transcriptional levels of IFN-α, IFN-β and IFN-γ were determined by qRT-PCR.

As shown in Figure 2, the expression levels of IFN-α and IFN-β in the brain of PRV infected mice were up-regulated at 24 hpi and peaked at 48 hpi (Figure 2A-B). Interesting, IFN-γ expression in brain was down-regulated before 36 hpi and then up-regulated until 60 hpi (Figure 2C). In addition, pro-inflammatory cytokines (TNF-α, IL-1β, IL-6 and IL-18) and anti-inflammatory cytokines (IL-4, IL-10) were also measured in the brain, respectively. The relative mRNA levels of TNF-α and IL-6 in brain were remarkably up-regulated caused by PRV infection, and peaked at 60 hpi followed by down-regulated but maintain at a high levels until 72 hpi (Figure 2D and F). After PRV infection, the IL-1β expression in brain was up-regulated from 24 hpi and lasted for the whole experiment period. However, IL-1β expression was up-regulated from 36 hpi and had a same trend as IL-1β. The cytokine stroms caused by IFN-α, IFN-β, TNF-α, IL-1β, IL-6 and IL-18 was related to the histopathological changes induced by PRV (Figure 1). Remarkably, the mRNA expression levels of IL-4 and IL-10 was up-reguated before 48 hpi and rapid down-regulated and maintained a low level until 72 hpi (Figure 2H and I). This indicated that PRV inhibited the expression of IL-4 and IL-10 since 48 hpi.

### 3.3 Detection of pyrolic cells in brain

Pyroptosis in brain was measured by Annexin V/PI double staining through flow cytometry. According to Figure 3, a large number of of PI+ pyroptotic cells in brain observed at 36, 48, 60 and 72 hpi, which increased remarkably in a time-dependent way (*p*<0.01) compared with than in the control group (Table S2). In addition, PRV significantly up-regulated *in situ* the protein expression of caspase-1 (Figure 4B-D), IL-1β (Figure 4F-H) and IL-18 (Figure 4J-L) in the brain tissue in a time-dependent manner.

### 3.4 Changes of protein expression levels related to pyroptosis in the brain

To further investigate the effect of PRV on pyroptosis *in vivo*, the proteins involved in pyroptosis signal pathway were detected by western blotting, including NLRP3, Caspae-1, GSDMD, IL-1β and IL-18. From the result in figure 5, NRRP3 decreased at 36 hpi followed by an increasing trendency in a time-dependent manner. In addition, the Caspase-1 level was significantly up-regulated by PRV from 24 hpi and manitained at a high level until the end of this experiment by compareing with that in the control group. Furthermore, GSDMD, an important pyroptosis marker protein, was also measured in all groups. As shown in Figure 5A, the amount of GSDMD was higher in all PRV group compared to the control. In addition, the expression levlels of IL-1β and IL-18, two cytokines related to pyroptosis, were determined by western blotting. The result demonstrated that PRV could elevated the protein levels of IL-1β and IL-18.

### 3.5 Relative mRNA expression of genes related to pyroptosis in the brain



158 The mRNA expression levels of pyroptosis-related factors were further detected by qRT-PCR in this research. As  
 159 shown in Table S3, the mRNA expression level of *NRRP3* were markedly increased ( $p<0.05$ ) in a time-dependent  
 160 manner following by PRV treatment. Moreover, the mRNA expression levels of *Caspase-1* in the PRV inoculation  
 161 groups were also up-regulated ( $p<0.01$ ) when by comparint that among groups. Besides, the *GSDMD* mRNA  
 162 expression level was up-regulated in an increased tendency ( $p<0.01$ ) compared with that in the pre-infection group.

## 4. Discussion

164 PRV is a kind of neurophilic  $\alpha$  herpesvirus, which belong to the genus *Varicelloviru*, family *Herpesviridae*. Pigs are  
 165 the only natural hosts of PRV for their survive to infection. However, mice and rats can be naturally infected with  
 166 PRV and cause a fatal disease. In lab, after intranasal infection in adult mice, PRV enters peripheral nerve cells and  
 167 spreads to the central nervous system<sup>10</sup>. Previous studies on PRV mainly focused on the pathogenicity and the  
 168 resulting host immune response. The aim of our research was to describe the kinetics of cytokine secretion *in vivo* and  
 169 to clarify whether cytokine storm involved in the pathogenesis of PRV. In this work, we identified cytokine strom and  
 170 pyroptosis as the main causes of rapid death in mice infected with PRV.

171 Innate immune system is the first line in defending against the invasion of pathogens, accompanied by the  
 172 recruitment of immune cells and the initiation of inflammatory response<sup>11</sup>. Inflammation is an important process to  
 173 solve microbial infection and a complex process involving the regulation of cytokine production. Dysfunction of these  
 174 mechanisms can induce cytokine storms and related multiple organ failure<sup>12</sup>. Inflammatory response is usually caused  
 175 by a variety of pro-inflammatory cytokines, such as TNF, IL-1 and IL-6. These cytokines are the kind of pleiotropic  
 176 proteins, which involves in the regulation of cell death in inflammatory tissue, vascular endothelial cell permeability,  
 177 attracting the blood cells to inflammatory tissue, and acute phase proteins production<sup>13</sup>.

178 Cytokines play an important role in all items of immune response, coordinating the innate and adaptive immune  
 179 response. Consequently, in most cases, cytokines play a protective role in resisting endogenous and exogenous  
 180 noxious stimuli, such as tissue injury and microbial invasion. IFNs are recognized as the central factors of antiviral  
 181 infection, which has a pivotal role in innate immune response<sup>14</sup>. In addition, Cytokines and interleukin play an  
 182 important role in the pathogenesis of antiviral and viral infection. However, excessive immune activation and  
 183 excessive release of cytokines could be rather pernicious<sup>15</sup>. For example, overexpression of TNF- $\alpha$ , IL-1, and IL-6 in  
 184 immune system could lead to vascular leakage, systemic fatigue, cardiomyopathy, vascular leakage, and acute phase  
 185 protein synthesis<sup>15</sup>. In addition, persistent excessive IFN- $\alpha/\beta$  may also be harmful to immune system<sup>14</sup>. In the present  
 186 study, we found that a strong cytokine strom was induced by PRV in mice brain from 36-72 hpi, including the  
 187 elevated expression levles of Type I IFNs (IFN- $\alpha$  and IFN- $\beta$ ) and Type II IFNs (IFN- $\gamma$ ) as well as proinflammatory  
 188 factors. This strom was consist with the histopathological changes in mice brain. Studies have shown that PRV  
 189 could regulate the expression of cytokines, including type I and type II interferon and inflammatory factors, to  
 190 establish a successful infection<sup>16, 17</sup>. Furthermore, IFN- $\alpha$  and IFN- $\beta$  mediates a positive feedback regulation by  
 191 binding to IFN- $\alpha$  and IFN- $\beta$  receptor in an automatic or paracrine manner<sup>18</sup>.

192 PRV infection causes apoptosis has been reproted previously *in vitro* and *in vivo*<sup>19, 20</sup>. However, apoptosis is usually  
 193 considered as an insoluble programmed cell death (PCD), which is characterized by an active programmed process of  
 194 cell decomposition to avoid inflammation<sup>21</sup>. The discrepancy found in this research may be induced by a new kind of  
 195 PCD in cell death process. Pyroptosis is a new type of pro-inflammatory cell death, which is emerging as the  
 196 mechanism of antagonizing and clearing pathogen infection, and requires the activation of caspase 1/4/5/11<sup>22</sup>. In this  
 197 research, the increasing tendency of pyroptotic cells induced by PRV were detected in brain through flow cytometry.  
 198 Furthermore, the expression of genes and proteins related to pyroptosis pathway were elevated by qRT-PCR and  
 199 Western Blotting methods, respectively. Inflammasomes are cytosolic sensors that could activate Caspase-1<sup>23</sup>. Once  
 200 activated, Caspase-1 has the ability to process and maturates IL-1 $\beta$  and IL-18 precursors, as well as cleave GSDMD,  
 201 resulting in cell membrane channel opening and pyroptosis<sup>8</sup>. Among the inflammasomes, NLRP3 is currently the  
 202 most well-known one, which responds to a variety of stimuli. NLRP3 was accivated by PRV in this research. In  
 203 addition, GSDMD, a key executor in pyrotosis<sup>24</sup>, also be activated by PRV. This activity of GSDMD leads to the  
 204 indirect release IL-1 $\beta$  and IL-18 from membrane pores<sup>25</sup>. The pyroptotic cell-fate decision provides a large amount of  
 205 inflammatory response at the site of infection. This was consist with the results from histopathological analysis  
 206 (Figure 1) and immunohistochemistry(Figure 4), as well as a full explanation for cytokine strom caused by PRV in  
 207 mice brain.

## 5. Conclusion

208 Cytokine stroms and pyroptosis might be the main cause for the rapid death of mice inoculated with PRV strain. This  
 209 results provided a new insight for further understanding the pathogenesis caused by PRV.

### Acknowledgments

212 Many thanks to Jiangtao Feng for his helping in animal administration.

### Ethical Statement

215 This study was approved by Animal Care and Use Committee of Tongren Polytechnic College. All animal administrations, sample  
 216 collection and procedures were performed by the guidelines approved.

### Funding Statement

219 This research was supported by Key Research Project of Guizhou Science and technology (No. [2019]1456), Tongren Science and  
 220 Technology Project (No. [2019]12-6).

222  
1 223  
2 224  
3 225  
4 226  
5 227  
6 228  
7 229  
8 230  
9 231  
10 232  
11 233  
12 234  
13 235  
14 236  
15  
16  
17  
18  
19  
20  
21  
22  
23  
24  
25  
26  
27  
28  
29  
30  
31  
32  
33  
34  
35  
36  
37  
38  
39  
40  
41  
42  
43  
44  
45  
46  
47  
48  
49  
50  
51  
52  
53  
54  
55  
56  
57  
58  
59  
60

### **Data Accessibility**

The datasets supporting this article have been uploaded in the form of “Supplementary Material”. In addition, the raw material related to this **wirk** are deposited at Dryad (<https://datadryad.org/stash/dataset/doi:10.5061/dryad.zw3r2287j>)<sup>25</sup>.

### **Competing Interests**

The authors declare that there is no conflict of interests to this research.

### **Authors' Contributions**

Shanshan Liu did the qRT-PCR and Western blotting experiment and drafted the manuscript; Wei Sun conceived this study and participated in the data analysis and artwork making; Rui Yuan did the animal experiment. Xuefei Huang and Jiansheng Yu ~~gave a~~ finally revised the manuscript.

## **References**



- 237 1. Alexander SV, Philipp GD, Marion S, 284  
 238 Joachim SH, Anton SEH, Max S, Matthias 285  
 1 239 K, Boris BL, Von BMS. 2018. Cytokine 286  
 2 240 release syndrome. *J Immunother Cancer* 6, 287  
 3 241 56. (doi:10.1186/s40425-018-0343-9). 288  
 4 242 (doi:10.1186/s40425-018-0343-9). 289  
 5 243 2. Broz P, Dixit VM 2016. Inflammasomes: 290  
 6 244 mechanism of assembly, regulation and 291  
 7 245 signalling. *Nat Rev Immunol* 16, 407-420. 292  
 8 246 (doi: 10.1038/nri.2016.58) 293  
 9 247 3. Cheung AK, Chen Z, Sun Z, Mccullough D 294  
 10 248 2000. Pseudorabies virus induces apoptosis 295  
 11 249 in tissue culture cells. *Arch Virol* 145, 2193- 296  
 12 250 2200.(doi: 10.1007/s007050070049) 297  
 13 251 3. Daniela, Tudor, and, Sabine, Riffault, and, 298  
 14 252 Charles, Carrat, and, François. 2001. Type 299  
 15 253 IFN Modulates the Immune Response 300  
 16 254 Induced by DNA Vaccination to 301  
 17 255 Pseudorabies Virus Glycoprotein C. *Virology* 302  
 18 256 286, 197-205.(doi: 10.1006/viro.2001.0957) 303  
 19 257 4. Delva JL, Nauwynck HJ, Mettenleiter TC, 304  
 20 258 Favoreel HW. 2020. The Attenuated 305  
 21 259 Pseudorabies Virus Vaccine Strain Bartha 306  
 22 260 K61: A Brief Review on the Knowledge 307  
 23 261 Gathered during 60 Years of Research. 308  
 24 262 *Pathogens* 9, 897. 309  
 25 263 (doi:10.3390/pathogens9110897) 310  
 26 264 5. Evavold CL, Ruan J, Tan Y, Xia S, Wu H, 311  
 27 265 Kagan JC. 2018. The Pore-Forming Protein 312  
 28 266 Gasdermin D Regulates Interleukin-1 313  
 29 267 Secretion from Living Macrophages. 314  
 30 268 *Immunity* 48, 35-44. 315  
 31 269 (doi: 10.1016/j.immuni.2017.11.013) 316  
 32 270 6. Fan S, Yuan H, Liu L, Li H, Guan H. 2020. 317  
 33 271 Pseudorabies virus encephalitis in humans: 318  
 34 272 a case series study. *J NeuroVirol* 26, 556-564. 319  
 35 273 (doi: 10.1007/s13365-020-00855-y) 320  
 36 274 7. Fink SL, Cookson BT. 2005. Apoptosis, 321  
 37 275 Pyroptosis, and Necrosis: Mechanistic 322  
 38 276 Description of Dead and Dying Eukaryotic 323  
 39 277 Cells. *Infect Immun* 73, 1907-1916.(doi: 324  
 40 278 10.1128/IAI.73.4.1907-1916.2005) 325  
 41 279 8. He WT, Wan H, Hu L, Chen P, Wang X, 326  
 42 280 Huang Z, Yang ZH. 2015. Gasdermin D is an 327  
 43 281 executor of pyroptosis and required for 328  
 44 282 interleukin-1 $\beta$  secretion. *Cell Res* 25, 1285- 329  
 45 283 1298.(doi: 10.1038/cr.2015.139) 330  
 46 9. Jorgensen I, Rayamajhi M, Miao EA. 2017 331  
 47 Programmed cell death as a defence against 332  
 48 infection. *Nat Rev Immunol* 17, 151-164. 333  
 49 (doi: 10.1038/nri.2016.147) 334  
 50 10. Klopfleisch R, Teifke JP, Fuchs W, Kopp 335  
 51 M, Klupp BG, Mettenleiter TC. 2004. 336  
 52 Influence of tegument proteins of 337  
 53 pseudorabies virus on neuroinvasion and 338  
 54 transneuronal spread in the nervous system 339  
 55 of adult mice after intranasal inoculation. *J 340  
 56 Virol* 78, 2956-2966.(doi: 10.1111/j.1600- 341  
 57 079X.2008.00631.x) 342  
 58 11. Klopfleisch R, Klupp BG, Fuchs W, Kopp 343  
 59 M, Teifke JP, Mettenleiter TC. 2006. 344  
 60 Influence of Pseudorabies Virus Proteins on 345  
 61 Neuroinvasion and Neurovirulence in Mice. 346  
 62 *J Virol* 80, 36-36. 347  
 63 (doi: 10.1128/JVI.02589-05) 348  
 64 12. Kogut MH, Lee A, Santin E. 2020. 349  
 65 Microbiome and pathogen interaction with 350  
 66 the immune system. *Poultry Sci* 99, 1906- 351  
 67 1913.(doi: 10.1016/j.psj.2019.12.011) 352  
 68 13. Mcnab F, Mayer-Barber K, Sher A, Wack 353  
 69 A, O'Garra A. 2015. Type I interferons in 354  
 70 infectious disease. *Nat Rev Immunol* 15, 87- 355  
 71 103. (doi: 10.1038/nri3787) 356  
 72 14. Mettenleiter TC 2020. Aujeszky's Disease 357  
 73 and the Development of the Marker/DIVA 358  
 74 Vaccination Concept. *Pathogens* 9, 563- 359  
 75 569. 360  
 76 (doi: 10.3390/pathogens9070563) 361  
 77 15. Miller LC, Zanella EL, Waters WR, Lager 362  
 78 KM. 2010. Cytokine Protein Expression 363  
 79 Levels in Tracheobronchial Lymph Node 364  
 80 Homogenates of Pigs Infected with 365  
 81 Pseudorabies Virus. *Clin Vaccine Immunol* 366  
 82 17, 728-734.(doi: 10.1128/CVI.00485-09) 367  
 83 16. Pomeranz LE, Reynolds AE, Hengartner 368  
 84 2005. Molecular biology of pseudorabies 369  
 85 virus: impact on neurovirology and 370  
 86 veterinary medicine. *Microbiology & 371  
 87 Molecular Biology Reviews: MMBR* 69, 462- 372  
 88 500. 373  
 89 (doi: 10.1128/MMBR.69.3.462-500.2005) 374  
 90 17. Romero CH, Meade PN, Shultz JE, Chung 375  
 91 HY, Lollis G. 2015. Venereal transmission 376  
 92 of pseudorabies viruses indigenous to feral 377  
 93 swine. *J Wildlife Dis* 37, 289-296. 378  
 94 (doi: 10.7589/0090-3558-37.2.289) 379  
 95 18. Takeuchi O, Akira S. 2010a. Innate 380  
 96 immunity to virus infection. *Immunol Rev* 381  
 97 227, 75-86. 382  
 98 (doi:10.1111/j.1600-065X.2008.00737.x) 383  
 99 19. Takeuchi O, Akira S. 2010b. Pattern 384  
 100 recognition receptors and inflammation. *Cell* 385  
 101 140, 805-820. 386  
 102 (doi: 10.1016/j.cell.2010.01.022) 387  
 103 20. Tisoncik JR, Korth MJ, Simmons CP, 388  
 104 Farrar J, Katze MG. 2012. Into the Eye of the 389  
 105 Cytokine Storm. *Microbiology & Molecular 390  
 106 Biology Reviews MMBR* 76, 16-32. 391  
 107 (doi: 10.1128/MMBR.05015-11) 392  
 108 21. Wei J, Ma Y, Wang L, Chi X, Yan R, Wang 393  
 109 S, Li X, Chen X, Shao W, Chen JL. 2017. 394  
 110 Alpha/beta interferon receptor deficiency in 395  
 111 mice significantly enhances susceptibility of 396  
 112 the animals to pseudorabies virus infection. 397  
 113 *Vet Microbiol* 203, 234-244.(doi: 398  
 114 10.1016/j.vetmic.2017.03.022) 399  
 115 22. Wu R, Bai C, Sun J, Chang S, Zhang X. 400  
 116 2013. Emergence of virulent pseudorabies 401  
 117 virus infection in Northern China. *J Vet Sci* 402  
 118 14, 363-365. 403  
 119 (doi: 10.4142/jvs.2013.14.3.363) 404  
 120 23. Yeh CJ, Lin PY, Liao MH, Liu HJ, Lee JW, 405  
 121 Chiu SJ, Hsu HY, Shih WL. 2008. TNF- 406  
 122 alpha mediates pseudorabies virus-induced 407  
 123 apoptosis via the activation of p38 MAPK 408  
 124 and JNK/SAPK signaling. *Virology* 381, 55- 409  
 125 66. (doi: 10.1016/j.viro.2008.08.023) 410  
 126 24. Zhou Z, He H, Wang K, Shi X, Shao F. 411  
 127 2020. Granzyme A from cytotoxic 412  
 128 lymphocytes cleaves GSDMB to trigger 413  
 129 pyroptosis in target cells. *Science* 368, 414  
 130 eaaz7548. 415  
 131 (doi: 10.1126/science.aaz7548) 416  
 132 25. Liu SS, Sun W, Huang XF, Yuan R, Yu JS. 417  
 133 2021. Data from: Cytokine storms and 418  
 134 Pyroptosis are primarily responsible for the 419  
 135 rapid death of mice infected with 420  
 136 Pseudorabies virus 421  
 137 (doi.org/10.5061/dryad.zw3r2287j) 422

377  
 378  
 379

### Figure captions

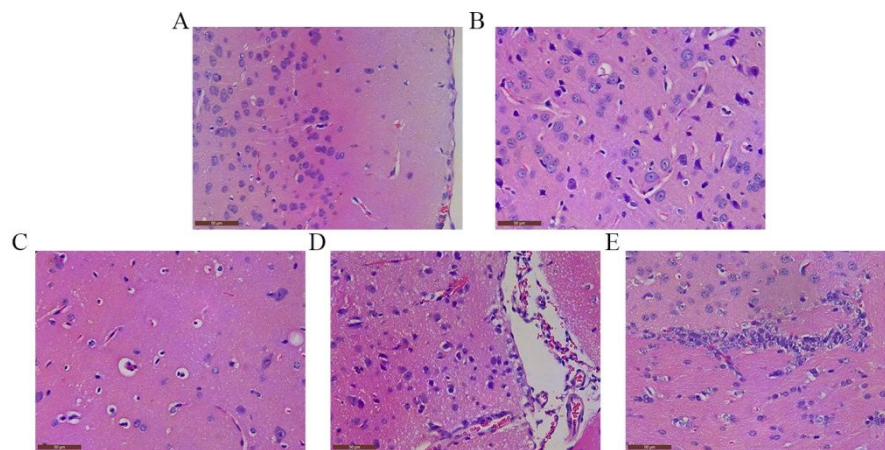

**Figure 1.** Histopathological changes of brain of PRV-inoculated examined by H.E staining. (A) Microscopic lesion in the control group; (B-E) PRV-infected mice from 24, 48, 60 and 72 hpi.

380  
 381  
 382

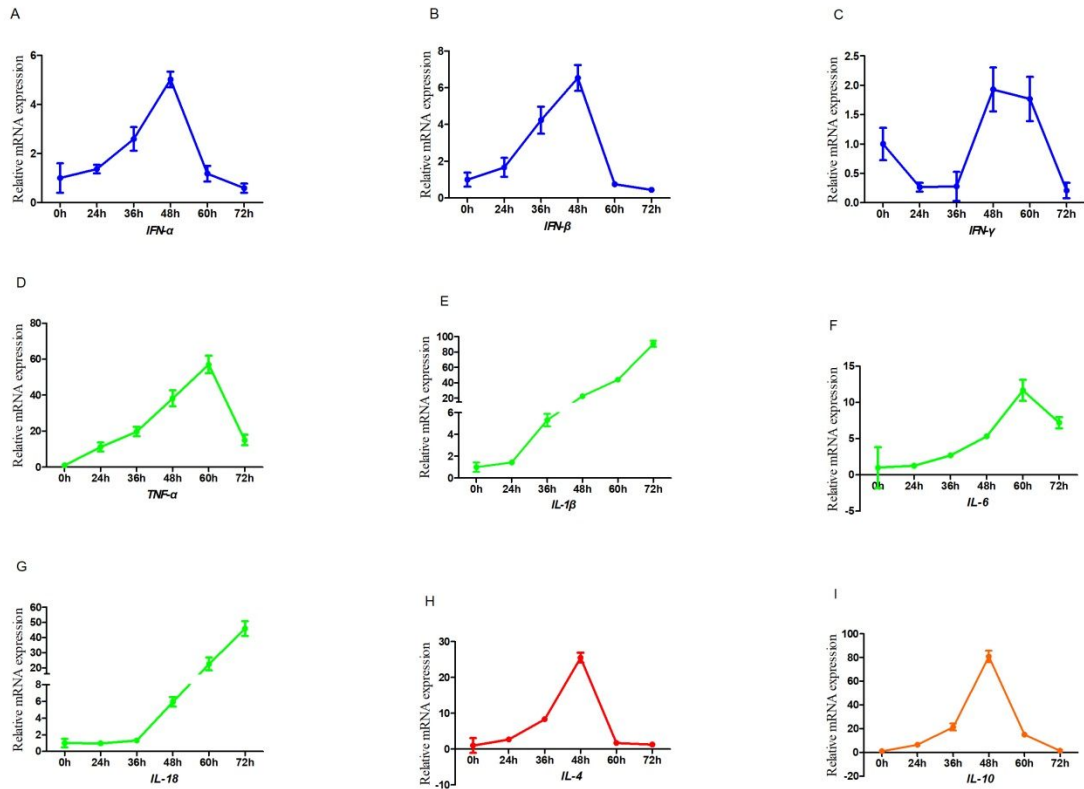

**Figure 2.** The dynamic changes of mRNA expression related to immune induced by PRV. (A) *IFN-α*; (B) *IFN-β*; (C) *IFN-γ*; (D) *TNF-α*; (E) *IL-1β*; (F) *IL-6*; (G) *IL-4*; (H) *IL-10*

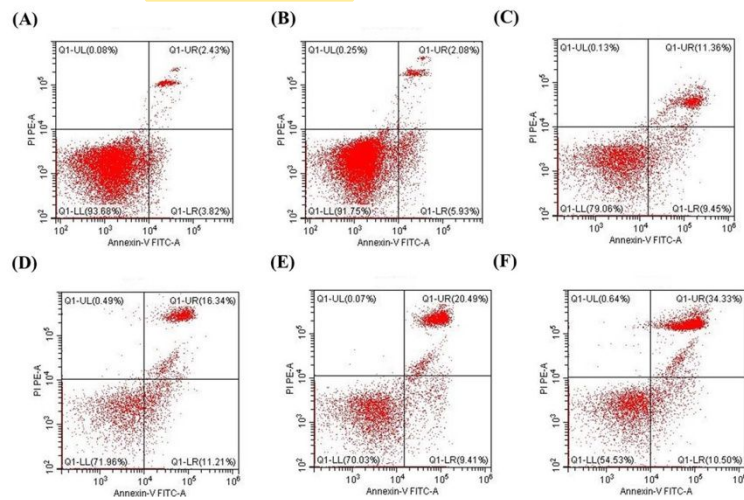

**Figure 3.** PRV caused pyroptosis in mice brain measured by flow cytometry. (A) Pre-infection; (B) 0 hpi; (C) 36 hpi; (D) 48 hpi; (E) 60 hpi; (F) 72 hpi;

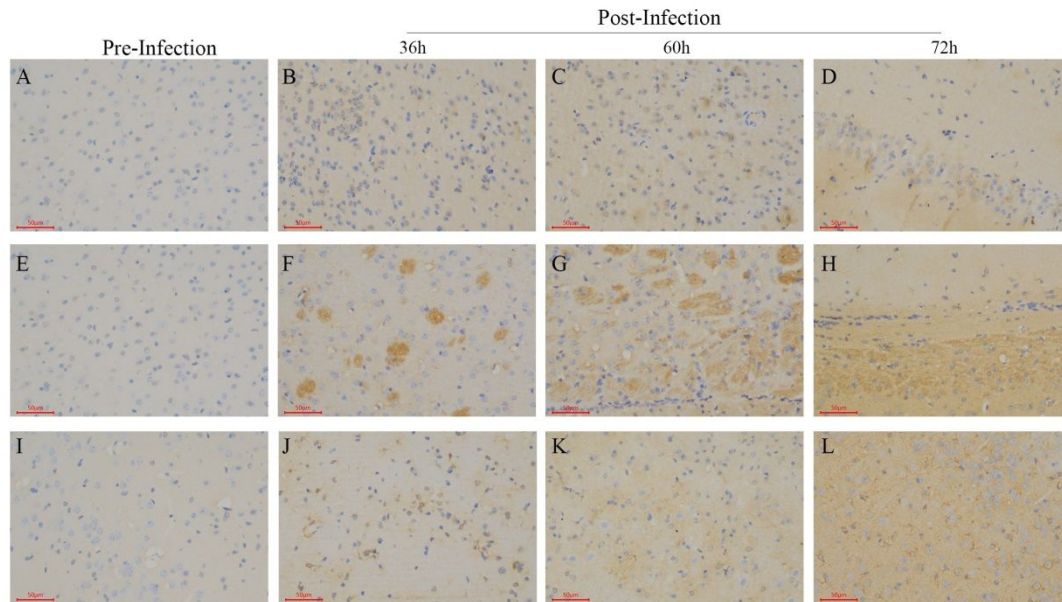

**Figure 4.** In situ expression of caspase-1, IL-1 $\beta$  and IL-18 in mice brain. (A) Caspase-1 expression in the pre-infection group; (B-D) Caspase-1 expression in brain at 36, 60 and 72 hpi; (E) IL-1 $\beta$  expression in the pre-infection group; (F-H) IL-1 $\beta$  expression in brain at 36, 60 and 72 hpi; (I) IL-18 expression in the pre-infection group; (J-L) IL-18 expression in brain at 36, 60 and 72 hpi; Scale bar=50  $\mu$ m.

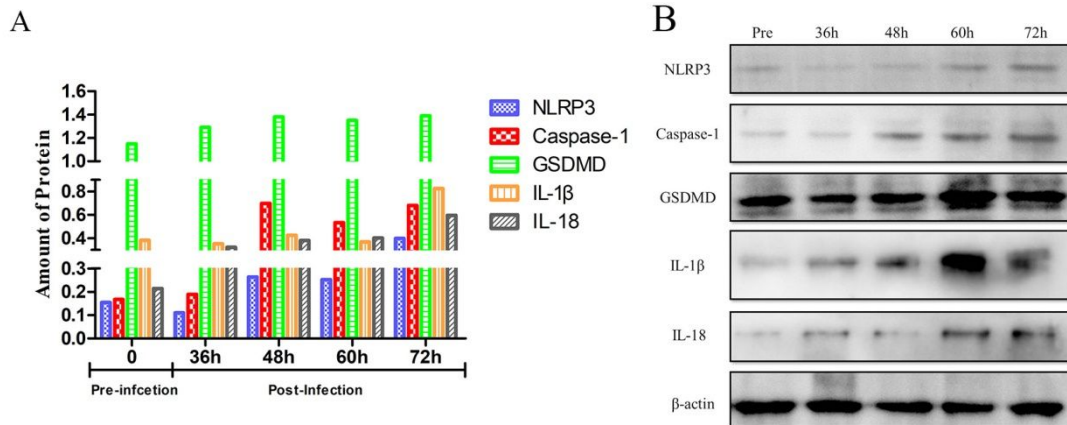

**Figure 5.** The protein expression related to pyroptosis induced by PRV. (A) The relative amount of protein to  $\beta$ -actin; (B) protein expression related to pyroptosis measured by western blotting.



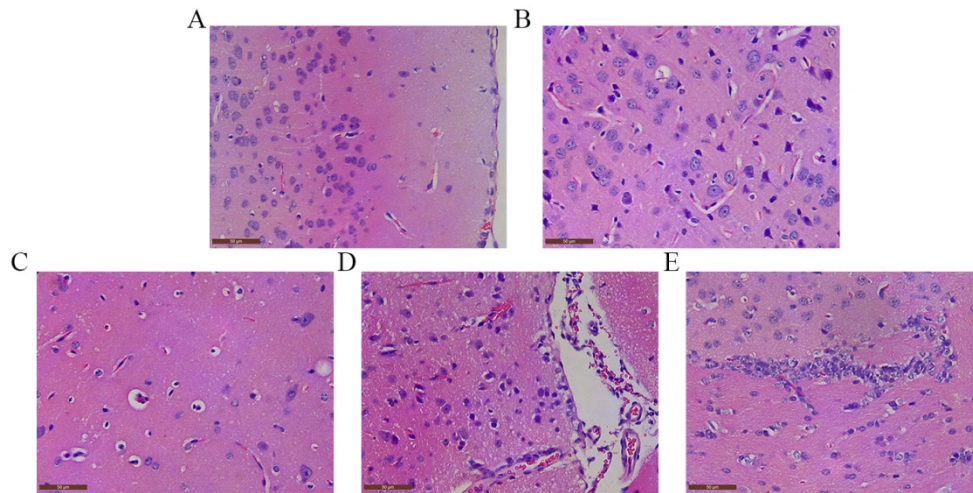

Figure 1. Histopathological changes of brain of PRV-inoculated examined by H.E staining. (A) Microscopic lesion in the control group; (B-E) PRV-infected mice from 24, 48, 60 and 72 hpi.

119x61mm (300 x 300 DPI)

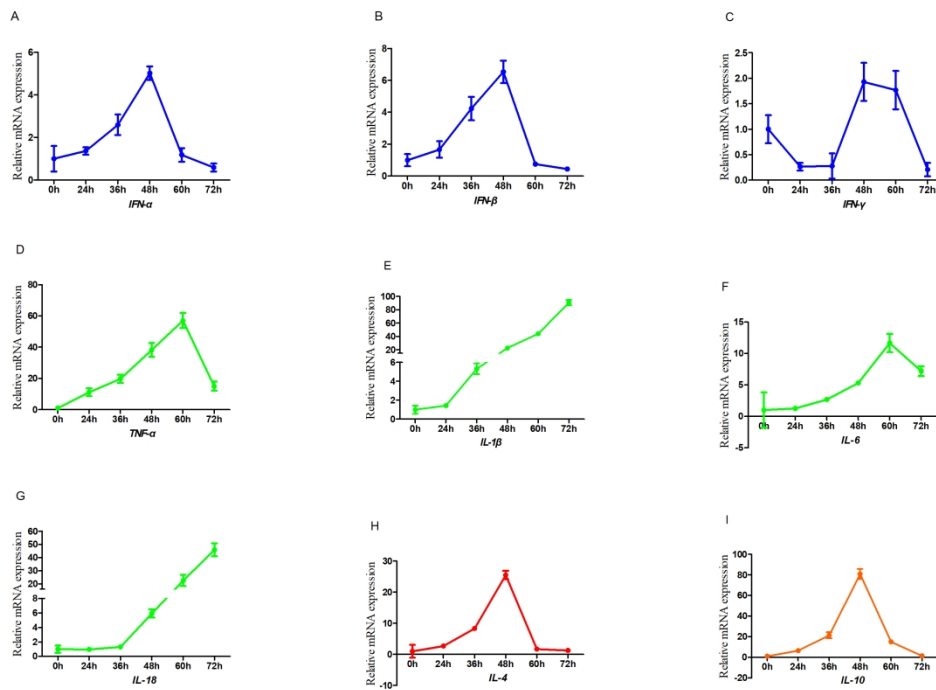

Figure 2. The dynamic changes of mRNA expression related to immune induced by PRV. (A) IFN- $\alpha$ ; (B) IFN- $\beta$ ; (C) IFN- $\gamma$ ; (D) TNF- $\alpha$ ; (E) IL-1 $\beta$ ; (F) IL-6; (G) IL-4; (H) IL-10

250x181mm (300 x 300 DPI)

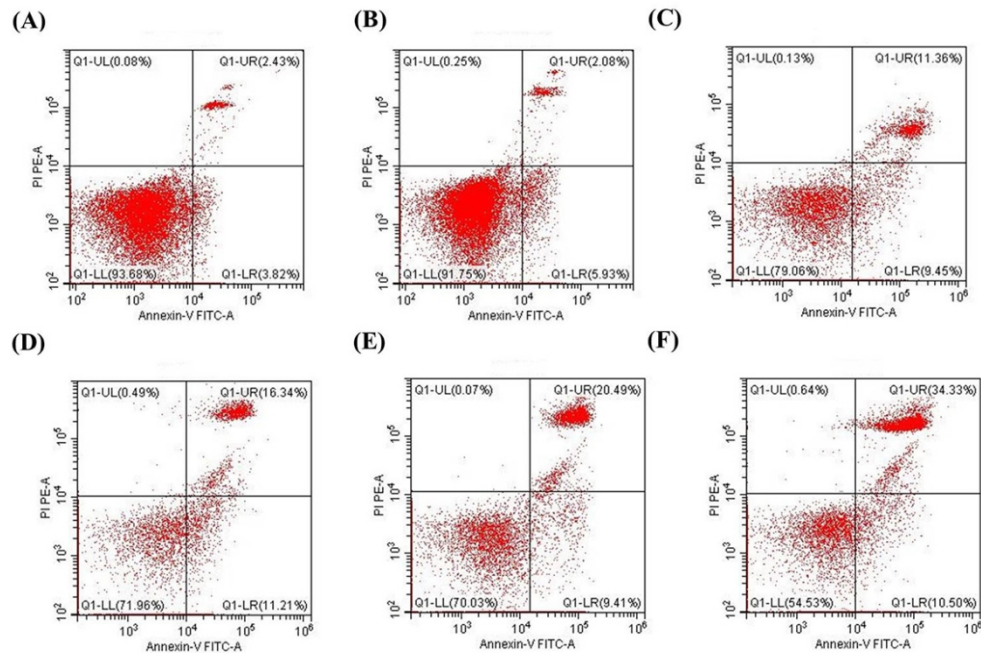

Figure 3. PRV caused pyroptosis in mice brain measured by flow cytometry. (A) Pre-infection; (B) 0 hpi; (C) 36 hpi; (D) 48 hpi; (E) 60 hpi; (F) 72 hpi;

99x65mm (300 x 300 DPI)

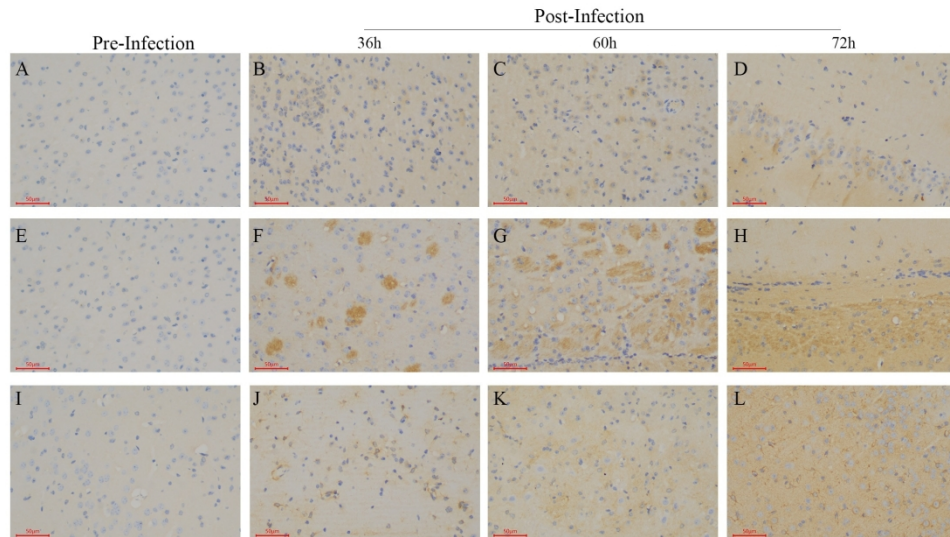

25 Figure 4. In situ expression of caspase-1, IL-1 $\beta$  and IL-18 in mice brain. (A) Caspase-1 expression in the  
26 pre-infection group; (B-D) Caspase-1 expression in brain at 36, 60 and 72 hpi; (E) IL-1 $\beta$  expression in the  
27 pre-infection group; (F-H) IL-1 $\beta$  expression in brain at 36, 60 and 72 hpi; (I) IL-18 expression in the  
28 pre-infection group; (J-L) IL-18 expression in brain at 36, 60 and 72 hpi; Scale bar=50  $\mu$ m.

29 199x112mm (300 x 300 DPI)

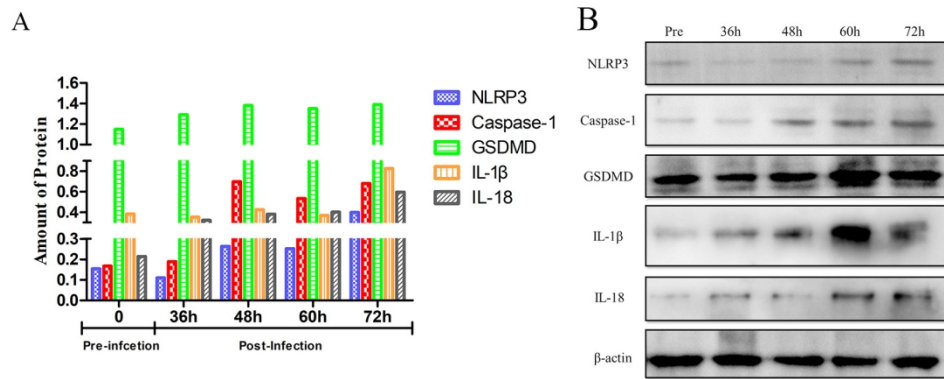

Figure 5. The protein expression related to pyroptosis induced by PRV. (A) The relative amount of protein to  $\beta$ -actin; (B) protein expression related to pyroptosis measured by western blotting.

150x61mm (300 x 300 DPI)



## Appendix B

Dear editors and reviews,

Thank you for your kind comments on our manuscript entitled "Cytokine storms and pyroptosis are primarily responsible for the rapid death of mice infected with pseudorabies virus". Those comments are all valuable and very helpful for revising and improving our paper. We have studied the comments carefully and have revised the manuscript according to the reviews' comments and suggestions. Revised portions are marked in red in the paper.

**Responses to the editors:**

**All wrong spelling has been revised in the manuscript.**

(1) Line 1 storms

**Response:** we have revised the line 1, 20, 135, 169, 186, 206 and 219 storms.

(2) Line 21 respectively.

**Response:** we have revised the line 20 : respectively.

(3) Line 32 largely

**Response:** we have revised the line 30 : largely.

(4) Line 38 virulence

**Response:** we have revised the line 36 : virulent.

(5) Line 39 basing

**Response:** we have revised the line 37 : based.

(6) Line 45 It known

**Response:** we have revised the line 37 : It is known.

(7) Line 48 proinflammatory

**Response:** we have revised the line 47 : pro-inflammatory.

(8) Line 52 pyroptosis-related

**Response:** we have revised the line 51: pyroptosis-related.

(9) Line 62 Eighty

**Response:** we have revised the line 62: Eighty.

(10) Line 75 photophate

**Response:** we have revised the line 75: phosphate .

(11) Line 87 visualized

**Response:** we have revised the line 87: visualize.

(12) Line 95 were

**Response:** we have revised the line 96: was.

(13) Line 97 corrcetion.

**Response:** we have revised the line 97: correction.

(14) Line 101 bradford

**Response:** we have revised the line 101: Bradford.

(15) Lines 110-111: SPSS22.0 software was used to data analyses. The results were espresented as means  $\pm$  standards deviations(mean $\pm$ SD)

**Response:** we have revised the line 110-111: SPSS22.0 software was used for data analyses. The results were presented as means  $\pm$  standards deviations (mean $\pm$ SD).

(16) Line 150, 197 tredency

**Response:** we have revised the line 153 and 203: tendency.

(17) Line 151 manitained

**Response:** we have revised the line 154: maintained.

(18) Line 152 compareing and 161 comparint

**Response:** we have revised the line 155: comparing it, and 162 compared.

(19) Line 154 levels

**Response:** we have revised the line 157: levels.

(20) Line 164 belong

**Response:** we have revised the line 169: belongs.

(21) Line 205 consist

**Response:** we have revised the line 212: consistent.

(22) Line 226 wirk

**Response:** we have revised the line 229: work.

## **Responds to the reviews' comments:**

### **Reviewer: 1**

Comments to the Author(s)

This paper has some merit addressing an important issue about the role of the immune response in the pathogenesis of the ADV infection in the mouse model.

(1) However, it needs a profound revision on the language, more detail in the figure legends, and a complete description of the experimental design (groups and number of animals).

**Response:** we have revised thought the manuscript to enhance the expression, grammar constructions and word spelling.

Figure legends have been improved in figure 1-5 in lines: 387-420.

Eighty 6-week-old female Balb/C mice were used in this study. We have revised in lines 64-65: “One week later, the mice were divided randomly into five groups with sixteen per group, including one control group and four experimental groups, which mice were infected at 36 hpi, 48 hpi, 60 hpi and 72 hpi, respectively.”

(2) Also I would recommend to discuss the evident limitations of the mouse model when extrapolating to economical species suffering of Pseudorabies.

**Response:** We have revised in lines 216-218: “Although cytokine storms and pyroptosis might be the cause for the rapid death of mice caused by PRV strain. However, due to the difference of immune system between mice and pig, more detail information about the pathogenesis to pig and other mammal animals need to be further clarify in future.”

(3) The statistical results also should be more explicit in the text and figures to strengthen the discussion.

**Response:** We have revised in “3.2 The mRNA expression levels about innate immune-related genes” from line 125-142.

Figure 1-4 have been improved to strengthen the results such as marking the statistical difference, and clarifying the the results and discussion sections.

(4) Going through the experimental design, it is not clear how the groups of animals were conformed. A total of eighty mice were divided into two groups (probably 40 control and 40 experimental), however, 6 animals of each group were killed at 4 different time points, given a total of 24 mice per group, what happened with the rest of the animals?

**Response:** We have revised in lines 64-65 to clarify the animal groups in this work: “One week later, the mice were divided randomly into five groups with sixteen per group, including one control group and four experimental groups, which mice were infected at 36 hpi, 48 hpi, 60 hpi and 72 hpi, respectively.”

(5) On figure 2 six time points were described (36 mice), however, no results on the control group were shown. All figures need a self-explanatory text. Figure 2 misses IL-18 text.

**Response:** all statistical results were compared with that in the control group. And figure coordinate has been relabeled so as not to cause misreading.

All figure legend have been modified and IL-18 text in figure 2 has been added in line 398.

(6) Although a statistical analysis is claimed to be applied on the results, differences were not shown in the text or on the figures. Since the groups of animals were not accurately described, the analysis must be detailed.

**Response:** we have added the statistical difference in the results of manuscript and figure 2.

The animals used in this study has been clearly described in the line 64-65. And the detail information about the results and discussion has been revised in the manuscript.

The other sections revised have been marked in red in the manuscript.

Thanks again for the excellent and professional revision of our manuscript. Hopefully, we could have our article been considered of publication in this journal. Should there been any other corrections we could make, please feel free to contact us by email. My email is sunwei\_223@163.com.

Yours sincerely,

Wei Sun

July 18<sup>th</sup>, 2021

# Appendix C

Dear editors and reviews,

Thank you for your kind comments on our manuscript entitled "Cytokine storms and pyroptosis are primarily responsible for the rapid death of mice infected with pseudorabies virus". Those comments are all valuable and very helpful for revising and improving our paper. We have studied the comments carefully and have revised the manuscript according to the reviews' comments and suggestions. Revised portion are marked in red in the paper.

## Responds to the reviews' and editors' comments:

### Reviewer: 1

Comments to the Author(s)

This paper is now suitable for publication. However, requires a further review of the language to make it more understandable.

**Response:** With the help of INCRESCIENCE co., Ltd (<https://check.newacademic.net>, a service resources purchased by our college), we have made extensive amendments on the manuscript to improve clarity, enhance expression and grammar constructions provide by the helping . We believe this revised manuscript is greatly improved in language use.

The detailed modification information is as follows:

| Category                                    | Score            |
|---------------------------------------------|------------------|
| <b>Plagiarism</b>                           | <b>67</b> of 100 |
| <b>Grammar</b>                              | <b>103</b>       |
| <b>Contextual Spelling</b>                  | <b>10</b>        |
| Misspelled words                            | 28               |
| Unfamiliar words                            | 6                |
| Confused words                              | 3                |
| Word clusters of English                    | 1                |
| <b>Grammar</b>                              | <b>30</b>        |
| Determiner use (a/an/the/this, etc.)        | 6                |
| Faulty subject-verb agreement               | 6                |
| Incorrect noun number                       | 4                |
| Wrong or missing prepositions               | 4                |
| <b>Punctuation</b>                          | <b>10</b>        |
| Comma misuse within clauses                 | 11               |
| Punctuation in compound/complex sentences   | 4                |
| Misuse of semicolons, quotation marks, etc. | 1                |
| <b>Sentence Structure</b>                   | <b>8</b>         |
| Unrelated sentences                         | 2                |
| Misplaced words or phrases                  | 1                |
| <b>Style</b>                                | <b>11</b>        |
| Wordy sentences                             | 6                |
| Improper formatting                         | 1                |
| Unclear text                                | 2                |
| Repetitive issues                           | 2                |
| <b>Vocabulary enhancement</b>               | <b>8</b>         |
| Word choice                                 | 4                |

\* Author for correspondence: [liujun@cah.zjhu.edu.cn](mailto:liujun@cah.zjhu.edu.cn) and [liujun111@cah.zjhu.edu.cn](mailto:liujun111@cah.zjhu.edu.cn)

† These authors contributed equally to this work  
Present address: College of Agriculture, Tongren Polytechnic College, Wuyang District, Tongren City, Guizhou, 550000, China

### 1 Introduction

Parasitoid virus (PV) is said to be present in the pathogen of porcine respiratory disease (PRD), which causes the respiratory system, nervous system and reproductive system (1). Many mammals, including pigs, are susceptible to PV infection, such as cattle, sheep, rabbits, cats, dogs, guinea pigs, rats and mice (2). However, pigs are the only susceptible animals that can survive, although the prognosis of the disease largely depends on the factors including vaccination site, virus strain and time of infection (3). AD is a highly infectious disease with high mortality in piglets. Transmission mainly occurs through direct contact with oral and nasal secretions but can also occur through aerosol and the placenta or sexual intercourse (4). Therefore, the persistence of PV has led to a wide range of economic losses in the pork production industry. Vaccination and enhanced sanitation have been developed to delay or reduce virus death. However, they cannot eradicate the disease because most of them... can prevent virus penetration and reproduction and shedding of viruses (5-7) (4). Due to the impact of AD on the pig industry, some countries are trying to eradicate AD based on the DIVA (Differentiating Infected From Vaccinated animals) program. However, since 2011, the outbreak of AD occurred in pigs vaccinated with PR vaccine in China, which indicates that the AD vaccine can not provide effective protection to prevent wild PR infection (8).

Mice and calves are equally used to study PV in the laboratory. After infection, animals showed abnormal reactions and nasal discharges, accompanied by viraemia and rapid death. In mice, PV shows characteristic of a

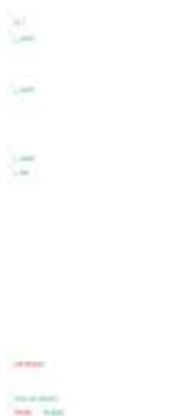

seropositive infection of the central nervous system (CNS), accompanied by fulminant central nervous symptoms and high mortality (9). PV is known to cause severe encephalitis in piglets, various neuro-viral lesions, even in humans (10). Few studies have focused on the pathogenesis of encephalitis. It is known that pyroptosis is involved in the immune response to various types of cells, which can be triggered by a variety of... pathological stimuli, leading to the secretion of pro-inflammatory cytokines and intracellular content (11). Inflammation is a double-edged sword, which has a crucial role in resolution. A mild inflammatory response could protect the body to a certain degree, help to repair damaged tissues, and be beneficial to steady-state re-organization. Nevertheless, excessive inflammation may form "cytokine storms",... leading to tissue damage. In the present work, we describe the influence of PV on the immune factor and pyroptosis-related factor... in mice brain.

Antiserum V-FITC/PV Antigen Kit was obtained from BD Company (Franklin Lakes, USA). Modified Bradford Protein Assay Kit, Antibody against NLRP3, Animal Total RNA Isolation Kit and... Three-Step Protein Extraction Kit were supplied by Sugen Biotech Company (Shanghai, China). Antibody against caspase-1 (CASP1) was bought from Thermo Fisher Company (USA). IL-18, IL-18 paf...  $\beta$ -actin antibodies were obtained from Boster Company (Beijing, China). Caspase-1 antibody was obtained from Boster Biological Technology Co., Ltd (Nantun, Hubei, China). Proteinase K (PK) reagent kit was bought from... DNASE I reagent (Dalian, China). HSY-HLJ strain (MH000776) isolated from Heilong Jiang was provided by Professor Enghu Wang... from Harbin Veterinary Research Institute, CAH. Eighty 6-week-old female Balb/c mice were obtained from Dony Experimental Animal Cooperation (Zhangji, China).

### 2.2 Experimental

One-week mice were divided randomly into five groups with seven per group, including one control group and four experimental groups, which mice were infected at 36 dpi... 48 dpi... and... 72 dpi... The mice in the

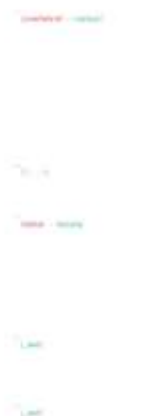

control group were injected with 0.2 mL of normal saline (NS) by intramuscular inoculation on the back. The mice in another group were received 0.2 mL PV-60.3 virus (10<sup>6</sup> TCID50/100  $\mu$ L) at the same inoculation site. The animals were fed on the same illumination with a 12 h light-dark cycle. The infection temperature and relative humidity were maintained at 22-24°C and 40-60%, respectively. Ten mice were fed in each cage and given the above dosage. Water and diet were... provided ad libitum. Mice brain tissues in each group were collected aseptically. Infection specimens were snap frozen... and stored at -80°C for RNA extraction. In addition, portions of the brain were fixed in 4% paraformaldehyde solution for histopathological examination.

### 2.3 Histopathological analysis

The histopathological observation was operated by using a standard laboratory procedure. The brain was removed from experimental animals and washed thoroughly in phosphate buffered... saline (PBS, pH 7.4). Then, the tissue was fixed in 4% paraformaldehyde for 2 d... and transferred to 30% sucrose... solution checked for dehydration. After that, processed... in paraffin embedding machine. The paraffin-embedded tissue was sliced into a five  $\mu$ m sections, directed to yellow and... then rehydrated in graded alcohols. The sections were stained with hematoxylin-eosin (H-E) staining and then examined under a light microscope for histopathological examination.

### 2.4 Detection of pyroptosis by flow cytometry to brain

The rate of pyroptosis cells in the brain was measured using an annexin V-FITC/PI Apoptosis kit according to the instructions provided. Brains were taken from mice, which were humanely killed at a time above mentioned... ground to fine a suspension gel... filtered with a 100-mesh nylon screen. The cells were washed three times with pre-cooled PBS and adjusted at a concentration of 1  $\times$  10<sup>6</sup> cells/mL. Furthermore, 100  $\mu$ L cells were incubated with annexin V-FITC/PI staining at room temperature for 15 min in a culture tube in a dark atmosphere. Each tube was added with 300  $\mu$ L of binding buffer and then directed with an FCM (Beckman Dickinson, USA). CellQuest Pro software (Beckman Dickinson, USA) was used to visualize the results.

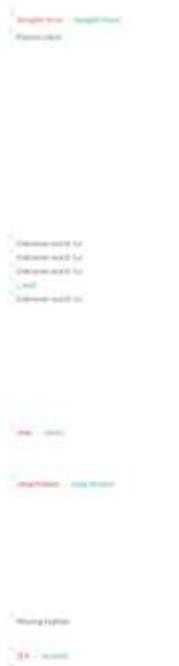

### 2.5 RNA extraction and qRT-PCR analysis

Total RNA from brain tissue... isolated by an "Animal RNA Isolation Kit" according to the kit instructions. RNA integrity was detected by 1% agarose gel electrophoresis. A spectrophotometer was used to detect the RNA quantity and quality (NanoDrop-2000, ThermoFisher Company, USA). Total RNA was converted into cDNA by qRT-PCR by using the PrimeScript RT reagent kit... The first strand of cDNA was amplified through EYBE indexing on a LightCycler 96 apparatus (Roche, Germany). All primers used in this research were designed by Oligo 7 software and synthesized by Sugen Biotech Ltd. (Shanghai, China). Detailed information about primers was available in Table S1. 2- $\Delta\Delta$ CT method was used for the analysis of... mRNA expression.  $\beta$ -actin, a housekeeping gene, was used as an internal control for values correction.

### 2.6 Western blotting

A "Three-Step Protein Extraction Kit" was used for protein extracted from the brain. The protein concentration of each specimen was measured by Bradford assay. The proteins were first separated on a 10% sodium dodecyl sulfate polyacrylamide gel electrophoresis (SDS-PAGE) followed by being transferred onto a polyvinylidene difluoride (PVDF) membrane. Then, the PVDF membrane was blocked with TBST solution contained with 3% bovine milk at room condition for 2 h and then incubated at 4°C condition for 12 h with the corresponding primary antibodies diluted with a solution (ALRP3 (1:1000), Caspase-1(1:800), GSDME(1:800), IL-1 $\beta$ (1:500), IL-18(1:500) and  $\beta$ -actin(1:2000)). Then, the PVDF membrane was incubated at room temperature with HRP-labeled secondary antibody for 1 h and... data were measured by an ECL reagent. The  $\beta$ -actin was used as a protein loading control.

### 2.7 Statistical analysis

SPSS23.0 software was used for data analysis. The... results were presented as mean  $\pm$  standard deviation (mean  $\pm$  SD). One-way analysis of variance (ANOVA)

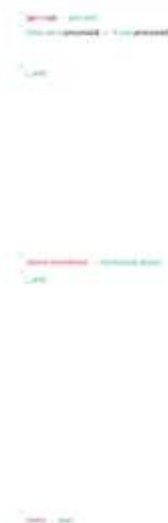

perhaps in SPSS 22.0 was used to evaluate the statistical significance between PVV and control group. GraphPad Prism 8 software was used to perform statistical analysis. In all statistical comparisons, the *p*-value was indicated as a judgement of the statistical difference.

## 2. Results

### 2.1 Clinical symptoms and histopathological analysis

At 30 dpi, the mice infected with PVV generally appeared typical clinical signs, including depression, anorexia and emaciation. Mortality occurred within the period of 40–72 dpi. However, none of the mice in the control group exhibited clinical symptoms or died. Compared with the control group, there was a significant difference in the microscopic lesions in the PVV-infected group (Figure 1). Normal brain structure was found in the control and PVV-infected mice before 30 dpi (Figure 1A and B). At 40 dpi, hippocampus appeared to be thin, followed by perivascular space widening, perivascular lymphocyte invasion, as well as degeneration and necrosis occurred in some neurons (Figure 1C). Focal inflammatory cellular infiltration was found in the brain at 60–72 dpi (Figure 1D and E).

### 2.2 The mRNA expression levels of immune response-related genes

Immune response recognizes invading pathogens by binding to pattern recognition receptors, leading to the expression of antiviral molecules. Interferon (IFN) is an antiviral molecule, which has a general role in the clearance of invading pathogens, including influenza. In this work, the transcriptional levels of IFN- $\alpha$ , IFN- $\beta$  and IFN- $\gamma$  were measured by qRT-PCR.

As shown in Figure 2, the expression levels of IFN- $\alpha$  and IFN- $\beta$  in the brain of PVV-infected mice were up-regulated from 30 dpi ( $p < 0.05$ ) and peaked at 40 dpi ( $p < 0.05$ ) and then down-regulated to 60–72 dpi ( $p < 0.05$ , Figure 2A–B). Furthermore, IFN- $\gamma$  expression in brain was down-regulated before 30 dpi and then up-regulated until 60 dpi ( $p < 0.05$ , Figure 2C). In addition, pro-inflammatory cytokines TNF- $\alpha$ , IL-1 $\beta$ , IL-6 and IL-17 and anti-inflammatory cytokines IL-4, IL-10 were also measured in the brain, respectively. The relative mRNA

1000000

1000000

1000000

1000000

1000000

1000000

1000000

1000000

1000000

1000000

1000000

1000000

1000000

1000000

1000000

1000000

1000000

1000000

1000000

1000000

1000000

1000000

1000000

1000000

1000000

1000000

1000000

1000000

1000000

1000000

1000000

1000000

1000000

1000000

1000000

1000000

1000000

1000000

1000000

1000000

1000000

1000000

1000000

1000000

1000000

1000000

1000000

1000000

1000000

1000000

1000000

1000000

1000000

1000000

1000000

1000000

1000000

1000000

levels of TNF- $\alpha$  and IL-6 in the brain were remarkably up-regulated caused by PVV infection and peaked at 40 dpi ( $p < 0.01$ ) followed by down-regulation at 72 dpi (Figure 2 D and E). After PVV infection, the IL-1 $\beta$  expression in the brain was up-regulated from 30 dpi and lasted for the whole experiment period ( $p < 0.01$ , Figure 2F). In addition, IL-18 expression was up-regulated from 30 dpi and had the same tendency as IL-1 $\beta$  ( $p < 0.01$ , Figure 2G). The cytokine storm caused by IFN- $\alpha$ , IFN- $\beta$ , TNF- $\alpha$ , IL-1 $\beta$ , IL-6 and IL-18 were related to the histopathological changes induced by PVV (Figure 1). Notably, the mRNA expression levels of IL-4 and IL-10 were up-regulated before 40 dpi ( $p < 0.01$ ) and then down-regulated and maintained a low level until 72 dpi (Figure 2H and I). This indicated that PVV inhibited the expression of IL-4 and IL-10 since 40 dpi.

### 2.3 Detection of pyroptotic cells in the brain

Pyroptosis in the brain was measured by Annexin V-FITC double staining through flow cytometry. As shown in Figure 3, a large number of PI<sup>+</sup> pyroptotic cells in the brain was observed at 30, 40, 60 and 72 dpi, which increased in a time-dependent way ( $p < 0.01$ ) compared with that in the control group (Table S2). In addition, PVV significantly up-regulated to activate the protein expression of caspase-1 (Figure 4D–E), IL-1 $\beta$  (Figure 4F–H) and IL-18 (Figure 4I–L) in the brain tissue in a time-dependent manner.

### 2.4 Changes in protein expression levels related to pyroptosis in the brain

To further investigate the effect of PVV on the pyroptosis in vivo, the proteins involved in pyroptosis signal pathway were detected by blotting, including NLRP3, Caspase-1, GSDMD, IL-1 $\beta$  and IL-18. From the result in Figure 5, NLRP3 decreased at 30 dpi followed by an increasing tendency in a time-dependent manner. In addition, the Caspase-1 level was significantly up-regulated by PVV from 30 dpi and maintained at a high level until the end of this experiment by comparing it with that in the control group. Furthermore, GSDMD, a pyroptosis marker protein, was also measured in all groups. As shown in Figure 5A, the amount of GSDMD was higher in all PVV groups than that in the control. In addition, the

1000000

1000000

1000000

1000000

1000000

1000000

1000000

1000000

1000000

1000000

1000000

1000000

1000000

1000000

1000000

1000000

1000000

1000000

1000000

1000000

1000000

1000000

1000000

1000000

1000000

1000000

1000000

1000000

1000000

1000000

1000000

1000000

1000000

1000000

1000000

1000000

1000000

1000000

1000000

1000000

1000000

1000000

1000000

1000000

1000000

1000000

1000000

1000000

1000000

1000000

1000000

1000000

1000000

1000000

1000000

1000000

1000000

1000000

1000000

expression levels of IL-1 $\beta$  and IL-18, two cytokines related to pyroptosis, were determined by blotting. The result demonstrated that PVV could increase the protein levels of IL-1 $\beta$  and IL-18.

### 2.5 Relative mRNA expression of genes related to pyroptosis in the brain

The mRNA expression levels of pyroptosis-related factors were further detected by qRT-PCR in this research. As shown in Table S3, the mRNA expression level of NLRP3 were markedly increased ( $p < 0.01$ ) in a time-dependent manner following PVV infection. Moreover, the mRNA expression levels of Caspase-1 in the PVV-infected groups were also up-regulated ( $p < 0.05$ ) when compared with the control group. Besides, the GSDMD mRNA expression level was up-regulated in an increasing tendency ( $p < 0.01$ ) compared with that in the control group.

### 3. Discussion

PVV is a kind of non-enveloped  $\beta$  herpesvirus, which belongs to the genus Varicellovirinae, family Herpesviridae. Pigs are the only natural hosts of PVV for their natural infection. However, mice and rats can be naturally infected with PVV and cause a fatal disease. In the lab, also natural infection in adult mice, PVV causes perivascular nerve cells and spreads to the central nervous system [6]. Previous studies on PVV mainly focused on pathogenicity and the resulting host immune response. The aim of this research was to describe the kinetics of cytokine secretion in vivo and to clarify whether cytokine storm is involved in the pathogenesis of PVV. In this work, we identified cytokine storm and pyroptosis as the main causes of rapid death in mice infected with PVV.

The immune system is the first line in defending against the invasion of pathogens, accompanied by the recruitment of immune cells and inflammatory response [7]. Inflammation is a process to solve microbial infection and a complex process involving the regulation of cytokine production. Dysfunction of these factors can induce cytokine storm and related multiple organ failure [8]. An inflammatory response is usually caused by various of pro-inflammatory cytokines, such as TNF- $\alpha$ , IL-1 and IL-6. These cytokines are the kind of pleiotropic

1000000

1000000

1000000

1000000

1000000

1000000

1000000

1000000

1000000

1000000

1000000

1000000

1000000

1000000

1000000

1000000

1000000

1000000

1000000

1000000

1000000

1000000

1000000

1000000

1000000

1000000

1000000

1000000

1000000

1000000

1000000

1000000

1000000

1000000

1000000

proteins, involves the regulation of cell death in inflammatory tissue, vascular endothelial cell permeability, attracting the blood cells to inflammatory tissue, and acute phase protein production [9].

Cytokines play an important role in all forms of the immune response, coordinating the innate and adaptive immune responses. Consequently, in most cases, cytokines play a protective role in limiting pathogenesis and organ damage. However, excessive immune activation and excessive release of cytokines could be rather detrimental. For example, over-expression of TNF- $\alpha$ , IL-1, and IL-6 in the immune system could lead to cardiac leakage, systemic fatigue, cardiomyopathy, and acute phase protein synthesis [10]. In addition, persistent excessive IFN- $\alpha$  may also be harmful to the immune system [4]. In the present study, we found that cytokine storm was induced by PVV in mice brain from 30–72 dpi, including the elevated expression levels of Type I IFNs (IFN- $\alpha$  and IFN- $\beta$ ) and Type II IFNs (IFN- $\gamma$ ) as well as pro-inflammatory factors compared to that in the control group ( $p < 0.01$ ). This storm was consistent with the histopathological changes including hippocampus and inflammatory cell infiltration in the mice brain. Studies have shown that PVV could regulate the expression of cytokines, including type I and type II interferon and inflammatory factors, to establish a successful infection [6, 17]. Furthermore, IFN- $\alpha$  and IFN- $\beta$  regulate a positive feedback regulation by binding to IFN- $\alpha$  and IFN- $\beta$  receptor as an autocrine or paracrine manner [18]. PVV infection can induce apoptosis, which has been reported previously in vivo and *in vitro* [19, 20]. However, apoptosis is usually considered as an avoidable programmed cell death (PCD), which is characterized by an active programmed process of cell decomposition to avoid inflammation [21]. The discrepancy was found in this research may be induced by a new kind of PCD in the cell

1000000

1000000

1000000

1000000

1000000

1000000

1000000

1000000

1000000

1000000

1000000

1000000

1000000

1000000

1000000

1000000

1000000

1000000

1000000

1000000

1000000

1000000

1000000

1000000

1000000

1000000

1000000

1000000

1000000

1000000

1000000

1000000

1000000

1000000

1000000

1000000

think process. Pyroptosis is a new type of pro-inflammatory cell death, which is emerging as the mechanism of unsparring and clearing pathogen infection and requires the activation of caspase-1 (45)(122). In this research, an increasing number of pyroptosis cells induced by PIV were observed in the brain through flow cytometry by comparing with the control group (p=0.01). Furthermore, the expression of genes and proteins related to pyroptosis pathways were observed by qRT-PCR and Western methods, respectively. Inflammation are closely related to central nervous system (23). Once activated, caspase-1 can process and mature IL-1 $\beta$  and IL-18 precursors, as well as cleave GSDME, resulting in cell membrane channel opening and the pyroptosis (45). Among the inflammasomes, NLRP1 is currently the most well known one, which response to various stimuli. NLRP1 was activated by PIV in this research. In addition, GSDME, a key molecule in pyroptosis, also was activated by PIV. The activity of GSDME leads to the indirect release of IL-1 $\beta$  and IL-18 from membrane pore(24). The pyroptosis cell-line decision provides a large amount of inflammatory response at the site of infection. This is also consistent with the results from histopathologic analysis (Figure 1) and immunohistochemistry (Figure 4), as well as a full explanation for cytokine storm caused by PIV in mice brain. Although cytokine storm and pyroptosis might be the cause for the rapid death of mice caused by PIV virus. However, due to the difference of immune system between mice and pig, more detailed information about the pathogenesis in pig and other mammal animals need to be further clarified in the future.

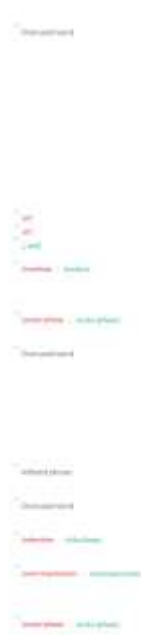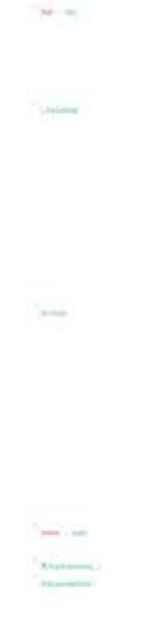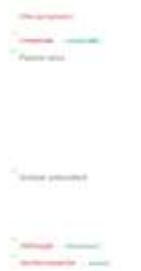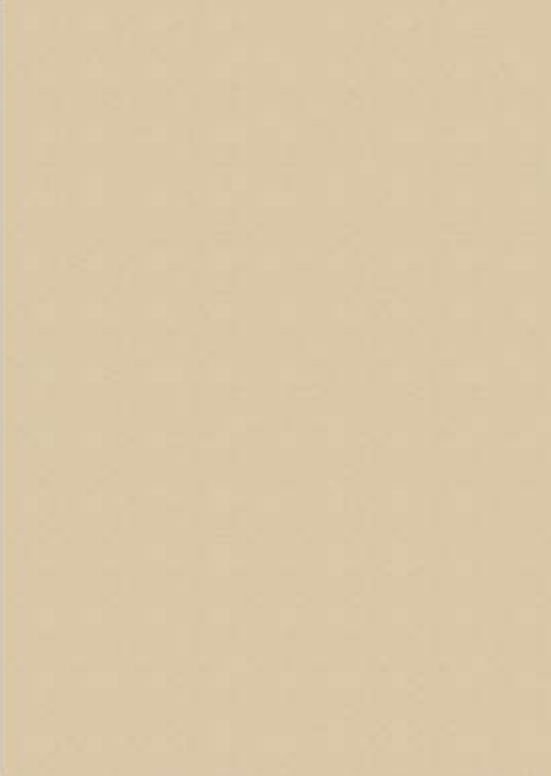



Please check up the comments made on the yellow marked words or phrases, as well as on the stroke out words in the reviewed PDF file and be sure to amend the errors.

(1) Line 17 PRV

**Response:** Pseudorabies virus can be abbreviated as PRV or PrV according the references.

(1) Line 22 immune

**Response:** we have revised in line 19 “ immune reaction”.

(2) Line 24 a

**Response:** we have deleted “a” line 21.

(3) Line 31 Besides

**Response:** we have deleted “a” line 28 “Many mammals, including pigs, .....”.

(4) Line 34 et al

**Response:** we have deleted “a” line 31 “.....as well as the age of pigs”.

(5) Line 36 through

**Response:** we have revised in line 33 “and”

(6) Line 67 respectively

**Response:** we have deleted “respectively” line 65.

(7) Line 69...was...of...

**Response:** we have revised in line 67 “...were received...”

(8) Line 84 protocol

**Response:** we have revised in line 82 “...instructions provided”.

(9) Line 92 directions

**Response:** we have revised in line 90 “... instructions”.

(10) Line 117 showed

**Response:** we have revised in line 116 “...appeared...”.

(11) Line 131 up

**Response:** we have revised in line 130 “...down-regulated...”.

(12) Line 136 but maintain at a high level until 72 hpi (p<0.01 and p<0.05, Figure 2D and F)

**Response:** we have revised in line 135 “...by down-regulated at 72 hpi (Figure 2 D and F)”.

(13) Line 138 However

**Response:** we have revised in line 136-137 “In addition...”.

(14) Line 143 pyroplc

**Response:** we have revised in line 142 “...pyroptosis...”.

(15) Line 146 than

**Response:** we have revised in line 145 “...that...”.

(16) Line 152 Caspae-1

**Response:** we have revised in line 151 “Caspase-1”.

(17) Line 166 *Varicelloviru*

**Response:** we have revised in line 168 “*Varicellovirus*”.

(18) Lines 212-213 detail information about the

**Response:** we have revised in line 215-216 “detailed information about the pathogenesis to pig and other mammal animals need to be further clarified in the future”.

(19) Lines 152, 158 and 202 western

**Response:** we have deleted western in lines 151, 157 and 204.

The other sections revised have been marked in red in the manuscript.

Thanks again for the excellent and professional revision of our manuscript. Hopefully, we could have our article been considered of publication in this journal. Should there been any other corrections we could make, please feel free to contact us by email. My email is sunwei\_223@163.com.

Yours sincerely,

Wei Sun
